# Local chromosome context is a major determinant of crossover pathway biochemistry during budding yeast meiosis

Darpan Medhi<sup>1,2</sup>, Alastair S. H. Goldman<sup>2</sup> and Michael Lichten<sup>1,3</sup>

<sup>1</sup>Laboratory of Biochemistry and Molecular Biology, Center for Cancer Research, National Cancer Institute, Bethesda, Maryland, USA

<sup>2</sup>Sheffield Institute for Nucleic Acids, Department of Molecular Biology and Biotechnology, The University of Sheffield, Sheffield, UK

<sup>3</sup>Correspondence: Michael Lichten, [mlichten@helix.nih.gov](mailto:mlichten@helix.nih.gov), +1 301 496 9760

Major subject area: Genes & chromosomes Ms tracking # 13-07-2016-ISRA-eLife-19669

## Abstract

Meiotic chromosomes are divided into regions of enrichment and depletion for meiotic chromosome axis proteins, in budding yeast Hop1 and Red1. These proteins are important for formation of Spo11-catalyzed DSB, but their contribution to crossover recombination is undefined. By studying meiotic recombination initiated by the sequence-specific *VMA1*-derived endonuclease (VDE), we show that meiotic chromosome structure helps to determine the biochemical mechanism by which recombination intermediates are resolved to form crossovers. At a Hop1-enriched locus, most VDE-initiated crossovers required the MutLγ resolvase, which forms most Spo11-initiated crossovers. In contrast, at a locus with lower Hop1 occupancy, most VDE-initiated crossovers were MutLγ-independent. In *pch2*

mutants, the two loci displayed similar Hop1 occupancy levels, and also displayed similar MutL $\gamma$ -dependence of VDE-induced crossovers. We suggest that meiotic and mitotic recombination pathways coexist within meiotic cells, with features of meiotic chromosome structure partitioning the genome into regions where one pathway or the other predominates.

## Introduction

The transition from the mitotic cell cycle to meiosis involves substantial changes in mechanisms of DNA double strand break (DSB) repair by homologous recombination (HR). Most mitotic HR repairs spontaneous lesions, and most repair products are non-crossovers (NCOs) that do not involve exchange of flanking parental sequences (Fabre et al., 1984; Kadyk and Hartwell, 1992) (Ira et al., 2003; Kelly, 1974; Pâques et al., 1998; Stark and Jasin, 2003; Taghian and Nickoloff, 1997; Virgin et al., 2001). In contrast, meiotic recombination is initiated by programmed DSBs (Cao et al., 1990; Sun et al., 1989) that often are repaired as crossovers (COs) between homologous chromosomes (homologs), with exchange of flanking parental sequences. Inter-homolog COs create physical linkages, called chiasmata, that ensure faithful homolog segregation during the first meiotic division, avoiding chromosome nondisjunction and consequent aneuploidy in gametes [reviewed by (Hunter, 2015)].

The DSBs that initiate meiotic recombination are formed by Spo11 in complex with a number of accessory proteins, and will be referred to here as Spo11-DSBs [reviewed by (Lam and Keeney, 2015)]. Spo11-DSBs and resulting recombination events are non-

uniformly distributed in the genomes of organisms ranging from budding yeast to humans

45 (Baudat and Nicolas, 1997; Blitzblau et al., 2007; Buhler et al., 2007; Gerton et al., 2000; Pan et al., 2011) (Fowler et al., 2013) (Wijnker et al., 2013) (Hellsten et al., 2013) (Singhal et al., 2015) (Smagulova et al., 2011) (Pratto et al., 2014). In budding yeast, this non-uniform distribution of Spo11-DSBs is influenced by meiosis-specific proteins, Red1 and Hop1, which are components of the meiotic chromosome axis. The meiotic chromosome

50 axis coordinates sister chromatids and forms the axial element of the synaptonemal complex, which holds homologs in tight juxtaposition (Hollingsworth et al., 1990; Page and Hawley, 2004; Smith and Roeder, 1997; Sym et al., 1993). Spo11-DSBs form frequently in large (ca 50-200 kb) “hot” domains that are also enriched for Red1 and Hop1, and these “hot” domains are interspersed with similarly-sized “cold” regions where Spo11-DSBs are

55 infrequent and Red1/Hop1 occupancy levels are low (Baudat and Nicolas, 1997; Blat et al., 2002; Blitzblau et al., 2007; Buhler et al., 2007; Pan et al., 2011; Panizza et al., 2011). Normal Spo11-DSB formation requires recruitment of Spo11 and accessory proteins to the meiotic axis (Panizza et al., 2011; Prieler et al., 2005), and Red1/Hop1 are also central to mechanisms that direct Spo11-DSB repair towards use of the homolog as a recombination

60 partner (Carballo et al., 2008; Niu et al., 2005; Schwacha and Kleckner, 1997). Other eukaryotes contain Hop1 analogs that share a domain, called the HORMA domain (Rosenberg and Corbett, 2015), and correlations between these meiotic axis proteins and DSB formation are observed in fission yeast, nematodes and in mammals (Fowler et al., 2013; Goodyer et al., 2008; Wojtasz et al., 2009). Thus, most meiotic interhomolog

65 recombination occurs in the context of a specialized chromosome structure and requires components of that structure.

Meiotic recombination pathways diverge after DSB formation and homolog-directed strand invasion. In budding yeast, about half of events form NCOs via synthesis-dependent strand annealing, a mechanism that does not involve stable recombination intermediates (Allers and Lichten, 2001a; Martini et al., 2011; McMahon et al., 2007) and is suggested to be the predominant HR pathway in mitotic cells (Bzymek et al., 2010; McGill et al., 1989; Mitchell et al., 2013). Most of the remaining events are repaired by a meiosis-specific CO pathway, in which an ensemble of meiotic proteins, called the ZMM proteins, stabilize early recombination intermediates and promote their maturation into double Holliday junction joint molecules (JMs)(Allers and Lichten, 2001a; Börner et al., 2004; Lynn et al., 2007; Schwacha and Kleckner, 1994). These ZMM-stabilized JMs are subsequently resolved as COs (Sourirajan and Lichten, 2008) through the action of the MutLγ complex, which contains the Mlh1, Mlh3, and Exo1 proteins (Argueso et al., 2002; 2004; Khazanehdari and Borts, 2000; Wang et al., 1999; Zakharyevich et al., 2010; 2012). MutLγ does not appear to make significant contributions to mitotic COs (Ira et al., 2003; Welz-Voegele et al., 2002). A minority of events form ZMM-independent JMs that are resolved as both COs and NCOs by the structure-selective nucleases (SSNs) Mus81-Mms4, Yen1, and Slx1-Slx4, which are responsible for most JM resolution during mitosis (Argueso et al., 2004; de los Santos et al., 2003; De Muyt et al., 2012; Zakharyevich et al., 2012) (Ho et al., 2010; Muñoz-Galván et al., 2012) [reviewed by (Wyatt and West, 2014)]. A similar picture, with MutLγ forming most meiotic COs and SSNs playing a minor role, is observed in several other eukaryotes (Falque et al., 2009; Franklin et al., 2006; Hassold et al., 2009; Kochakpour and Moens, 2008;

Lhuissier et al., 2007; Plug et al., 1998; Tease and Hultén, 2004) (Higgins et al., 2008;  
 90 Holloway et al., 2008).

To better understand the factors that promote the unique biochemistry of CO formation during meiosis, in particular MutLy-dependent JM resolution, we considered two different hypotheses. In the first, expression of meiosis-specific proteins and the presence of high  
 95 levels of Spo11-DSBs results in nucleus-wide changes in recombination biochemistry, shifting the balance towards MutLy-dependent resolution of JMs, wherever they might occur. In the second, local features of meiotic chromosome structure, in particular enrichment for meiosis-specific chromosome axis proteins, provides an *in cis* structural environment that favors MutLy-dependent JM resolution. However, because Spo11-DSBs  
 100 form preferentially in Red1/Hop1-enriched regions, and because these proteins are required for efficient Spo11-DSB formation and interhomolog repair, it is difficult to distinguish these two models by examining Spo11-initiated recombination alone.

To test these two hypotheses, we developed a system in which meiotic recombination is  
 105 initiated by the sequence- and meiosis-specific *VMA1* derived endonuclease, VDE (Gimble and Thorner, 1992; Nagai et al., 2003). VDE initiates meiotic recombination at similar levels wherever its recognition sequence (*VRS*) is inserted (Fukuda et al., 2008; Neale et al., 2002; Nogami et al., 2002). VDE- catalyzed DSBs (hereafter called VDE-DSBs) form independent of Spo11 and meiotic axis proteins. However, like Spo11-DSBs, VDE-DSBs form after pre-  
 110 meiotic DNA replication and are repaired using the same end-processing and strand invasion activities that repair Spo11-DSBs (Fukuda et al., 2003; Hodgson et al., 2011; Neale

et al., 2002). We examined resolvase contributions to VDE-initiated CO formation, and obtained evidence that local enrichment for meiotic axis proteins promotes MutL $\gamma$ -dependent CO formation; while recombination that occurs outside of this specialized

environment forms COs by MutL $\gamma$ -independent mechanisms. We also show that CO formation at a locus, and in particular MutL $\gamma$ -dependent CO formation, requires Spo11-DSB formation elsewhere in the genome.

## Results

### Using VDE to study meiotic recombination at “hot” and “cold” loci

The recombination reporter used for this study contains a VDE recognition sequence (*VRS*) inserted into a copy of the *ARG4* gene on one chromosome, and an uncleavable mutant recognition sequence (*VRS103*) on the homolog (Figure 1). Restriction site polymorphisms at flanking *HindIII* sites, combined with the polymorphic *VRS* site, allow differentiation of parental and recombinant DNA molecules. This recombination reporter was inserted at two loci: *HIS4* and *URA3*, which are “hot” and “cold”, respectively, for Spo11-initiated recombination and Red1/Hop1 occupancy (Borde et al., 1999; Buhler et al., 2007; Pan et al., 2011; Panizza et al., 2011; Wu and Lichten, 1995); also see Figure 4A and Figure 4--figure supplement 1, below). Consistent with previous reports, Spo11-DSBs and the resulting crossovers, are five times more frequent in inserts at *HIS4* than at *URA3* (Figure 1—figure supplement 1A). When VDE is expressed, ~90% of *VRS* sites at both loci were cleaved by 7 h after initiation of sporulation (Figure 2A), consistent with previous reports that VDE cuts very efficiently (Johnson et al., 2007; Neale et al., 2002; Terentyev et al., 2010). DSBs

appeared and disappeared with similar timing at the two loci (Figure 2B), with measures of insert recovery (Figure 2—figure supplement 1A) and levels of interhomolog recombinants relative to cumulative VDE-DSB levels (Figure 2—figure supplement 1B) indicating that ~70% of VDE DSBs are repaired by interhomolog recombination. The remaining *VRS*-containing inserts appear to be lost, consistent with high levels of VDE activity preventing recovery of inter-sister recombinants. Thus, the two VDE recombination reporter inserts undergo comparably high levels of meiotic recombination initiation, regardless of the local intrinsic level of Spo11-initiated recombination.

When VDE-DSBs are repaired by interhomolog recombination, *VRS* sequences are converted to *VRS103*, and become resistant to digestion by VDE. We therefore used *HindIII*/VDE double digest to score VDE-initiated recombination (Figure 1). By comparing levels of recombinants in VDE-expressing and *vdeΔ* strains, we determined that Spo11-initiated events make a negligible contribution to recombinants scored in VDE-expressing strains (Figure 2C, Figure 1—figure supplement 1). VDE-initiated recombinants formed at high frequencies at both *HIS4* and *URA3* (Figure 2C), and NCOs exceeded COs by approximately twofold at *HIS4* and threefold at *URA3* (Figure 2D). These values are within the range observed in genetic studies of Spo11-induced gene conversion in budding yeast (Fogel et al., 1979), but differ from the average of near-parity between NCOs and COs observed in molecular assays (Lao et al., 2013; Martini et al., 2006). VDE, unlike Spo11, frequently cuts both sister chromatids (Gimble and Thorner, 1992; Zhang et al., 2011), and this may reduce the fraction of DSBs that are repaired as COs (Malkova et al., 2000).

## MutL $\gamma$ makes different contributions to VDE-initiated CO formation at the two insert loci

While VDE-initiated recombination occurred at similar levels in inserts located at *HIS4* and at *URA3*, we observed a marked difference between the two loci, in terms of the resolvase-dependence of CO formation (Figure 3). At the *HIS4* locus, COs were reduced in *mlh3* mutants, which lack MutL $\gamma$ , by ~60% relative to wild type. COs were reduced by ~30% in *mms4-mdy1 $\Delta$  slx1 $\Delta$*  mutants, (hereafter abbreviated as *ssn* mutants), which lack the three structure selective nucleases (SSNs) active during both meiosis and the mitotic cell cycle, and by ~75% in *mlh3 ssn* mutants. Thus, like Spo11-initiated COs, VDE-initiated COs in inserts at *HIS4* are primarily MutL $\gamma$ -dependent, and less dependent on SSNs. In contrast, COs in inserts located at *URA3* were reduced by only ~10% in *mlh3*, by ~40% in *ssn* mutants, and by ~60% in *mlh3 ssn* mutants, leaving approximately the same residual CO levels as was seen at *HIS4*. Thus, SSNs make a substantially greater contribution to VDE-initiated CO formation at *URA3* than does MutL $\gamma$ , and MutL $\gamma$ 's contribution becomes substantial only in the absence of SSNs.

At both insert loci, *ssn* and *mlh3 ssn* mutants accumulated DNA species with reduced electrophoretic mobility (Figure 3—figure supplement 2). These slower-migrating species contain branched DNA molecules, as would be expected for unresolved joint molecules (D. M., unpublished observations). Steady state VDE-DSB levels and final NCO levels were similar in all strains (Figure 3D, Figure 3—figure supplement 1), indicating that resolvases do not act during the initial steps of DSB repair, and that most meiotic NCOs form by



mechanisms that do not involve Holliday junction resolution (Allers and Lichten, 2001a; De Muyt et al., 2012; Sourirajan and Lichten, 2008; Zakharyevich et al., 2012).

180

### **Altered Hop1 occupancy in *pch2* mutants is associated with altered MutL $\gamma$ -dependence of VDE-initiated COs**

The marked MutL $\gamma$ -dependence and -independence of VDE-initiated COs in inserts at *HIS4* and at *URA3*, respectively, are paralleled by levels of occupancy at the two loci of the  
185 meiotic axis proteins, Hop1 and Red1 (Panizza et al., 2011); Figure 4A, Figure 4—figure supplement 1A). To ask if differential Hop1 occupancy is responsible for the observed differences in CO formation at these loci, we examined the resolvase-dependence of VDE-initiated COs in *pch2Δ* mutants. Pch2 is a conserved AAA ATPase that maintains the nonuniform pattern of Hop1 occupancy along meiotic chromosomes (Börner et al., 2008;  
190 Joshi et al., 2009). The different Hop1 occupancies seen in wild type were preserved early in meiosis in *pch2Δ* mutants (Figure 4A, Figure 4—figure supplement 1A), consistent with previous findings that, in *pch2* cells, Spo11-DSB patterns are not altered in most regions of the genome (Vader et al., 2011). By contrast, at later times (4-5 h after initiation of meiosis), *pch2Δ* mutants displayed reduced Hop1 occupancy at *HIS4*, more closely  
195 approaching the lower occupancy levels seen throughout meiosis at *URA3* (Figure 4A; Figure 4—figure supplement 4A).

While VDE-induced DSB dynamics and NCO levels were similar in *PCH2* and *pch2Δ* strains (Figure 4—figure supplement 1B, C), the loss of Pch2 was accompanied by a marked

change in MutL $\gamma$  contributions to VDE-initiated COs. The majority of COs became MutL $\gamma$ -independent at both insert loci (Figure 4B, C). At *HIS4*, the fraction of COs that were MutL $\gamma$ -dependent decreased substantially (from ~60% in *PCH2* to 20% in *pch2 $\Delta$* ), while at *URA3* the fraction that were MutL $\gamma$ -dependent increased (from ~10% to 37%). Thus, in *pch2 $\Delta$*  mutants, the similarity of Hop1 occupancy at later times in meiosis is paralleled by a shift in the MutL $\gamma$ -dependence of VDE-initiated COs, with contributions of MutL $\gamma$  to COs in inserts at *HIS4* and *URA3* becoming more similar.

### **Spo11-DSBs promote VDE-initiated, MutL $\gamma$ -dependent COs**

All experiments reported above used cells with wild-type levels of Spo11-DSBs. While VDE-DSBs form at similar levels and timing in *SPO11* and *spo11* mutant cells (Johnson et al., 2007; Neale et al., 2002; Terentyev et al., 2010), features of VDE-DSB repair, including the extent of end resection, are strongly influenced by the presence or absence of Spo11-DSBs (Neale et al., 2002). To determine if other aspects of VDE-initiated recombination are also affected, we examined VDE-initiated recombination in a catalysis-null *spo11-Y135F* mutant, hereafter called *spo11*. In *spo11* mutants, VDE-DSB dynamics and NCO formation were similar in inserts at *HIS4* and *URA3*, were comparable to those seen in wild type (Figure 5—figure supplement 1), and were independent of HJ resolvase activities (Figure 5—figure supplement 1). In contrast, the absence of Spo11-DSBs substantially reduced VDE-induced COs, resulting in virtually identical CO timing and levels at the two loci (Figure 5A). Unlike the ~60% reduction in COs seen at *HIS4* in *SPO11 mlh3 $\Delta$*  (Figure 3C), final CO levels were similar in *spo11 mlh3 $\Delta$*  and *spo11 MLH3* strains, at both *HIS4* and *URA3*, and similar CO

reductions were observed at both loci in *spo11 snn* mutants (Figure 5B, C). Thus, processes that depend on Spo11-DSBs elsewhere in the genome are important to promote VDE-initiated COs, and appear to be essential for MutL $\gamma$ -dependent CO formation.

## Discussion

### Local chromosome structure influences meiotic CO formation

We examined the contribution of different Holliday junction resolvases to VDE-initiated CO-formation in recombination reporter inserts at two loci, *HIS4* and *URA3*, which are “hot” and “cold”, respectively, for Spo11-initiated recombination and for occupancy by the meiotic chromosome axis proteins, Hop1 and Red1. VDE-initiated COs at *HIS4* are similar to those initiated by Spo11, in that most depend on MutL $\gamma$ . In contrast, VDE-initiated COs at the “cold” locus, *URA3*, more closely resemble mitotic COs, which are independent of MutL $\gamma$ , but are substantially dependent on SSNs (Ho et al., 2010; Ira et al., 2003; Muñoz-Galván et al., 2012; Welz-Voegele et al., 2002). Locus-dependent differences in MutL $\gamma$ -dependence are reduced in *pch2 $\Delta$*  mutants, as are differences in Hop1 occupancy at later times in meiosis I prophase. Based on these findings, we suggest that local chromosome context exerts an important influence on the biochemistry of CO formation during meiosis, and that factors responsible for creating DSB-hot and -cold domains also create corresponding domains where different DSB repair pathways are dominant. An attractive hypothesis (Figure 6) is that regions enriched for meiosis-specific axial element proteins create a chromosomal environment that promotes meiotic DSB formation, limits inter-sister recombination, preferentially loads ZMM proteins (Joshi et al., 2009; Serrentino et al.,

2013), and is required for recruitment of MutLγ. In such regions, where most Spo11-dependent events occur, recombination intermediates will have a greater likelihood of being captured by axis-associated ZMM proteins, and consequently being resolved as COs by MutLγ. Regions with lower axial element protein enrichment are less likely to recruit ZMM proteins and MutLγ; DSB repair and CO formation in these regions is more likely to involve non-meiotic mechanisms. In short, the meiotic genome can be thought of as being apportioned between two different environments: meiotic axis protein-enriched regions, where “meiotic” recombination pathways predominate; and meiotic axis protein-depleted regions, in which recombination events more closely resemble those seen in mitotic cells.

While the current study is the first to directly query the effect of chromosome context on JM resolution, others have obtained results that are consistent with an effect of local chromosome context on meiotic DSB repair. Malkova and coworkers used the HO endonuclease to initiate recombination in meiotic cells at *LEU2*, also a “hot” locus (Panizza et al., 2011; Wu and Lichten, 1995). The resulting COs were dependent on Msh4, a ZMM protein, to the same degree as are Spo11-induced COs, suggesting that these nuclease-induced COs at the axis enriched *LEU2* locus (Panizza et al., 2011) were the products of ZMM/MutLγ-dependent JM resolution (Malkova et al., 2000). Consistent with our suggestion that different recombination mechanisms operate in different parts of the genome, the meiotic genome also appears to be divided into regions that respond to DNA damage in different ways. Treatment of meiotic yeast cells with phleomycin, a DSB-forming agent, triggers Rad53 phosphorylation, as it does in mitotic cells, while Spo11-DSBs do not (Cartagena-Lirola et al., 2008). This indicates that Spo11-DSBs form in an environment that

is refractory to Rad53 recruitment and modification, but that there also are regions in the meiotic genome where exogenously-induced damage can trigger the mitotic DNA damage response. In light of these ideas, it is interesting that the meiotic defects of *spo11* mutants in a variety of organisms are often only partially rescued by treatment with exogenous agents that cause DSBs (Bowring et al., 2006; Celerin et al., 2000; Dernburg et al., 1998; Loidl and Mochizuki, 2009; Pauklin et al., 2009; Storlazzi et al., 2003; Thorne and Byers, 1993). While other factors may be responsible for the limited rescue observed, we suggest that it reflects the random location of exogenously-induced DSBs, with only a subset forming in regions where repair is likely to form interhomolog COs that promote proper homolog segregation.

### **The interplay of resolvase activities is chromosome context-dependent**

Although we observe marked differences in the contributions of different resolvases to VDE-induced CO formation at *HIS4* and at *URA3*, there is no absolute demarcation between MutLy and SSN activities at the two loci. At *HIS4*, where MutLy predominates, *ssn* mutants still display a modest reduction in VDE-initiated COs when MutLy is active, but an even greater relative reduction in the absence of MutLy. These findings are consistent with previous studies suggesting that, in the absence of MutLy, SSNs are able to serve as a back-up JM resolvase (Argueso et al., 2004; De Muyt et al., 2012; Zakharyevich et al., 2012). Our current data indicate that the converse may also be true, since at *URA3*, MutLy appears to make a greater contribution to CO formation in the absence of SSNs than in their presence. However, in our studies, JMs are more efficiently resolved in *mlh3Δ* mutants than in *ssn* mutants, which display persistent unresolved JMs. Therefore, if MutLy acts as a back-up resolvase, it can do so in only a limited capacity, possibly reflecting a need for a specific

chromosome structural context in which to function efficiently. The absence of such a

meiosis-specific chromosome context may explain why MutLy does not appear to contribute to CO formation during the mitotic cell cycle (Ira et al., 2003; Welz-Voegele et al., 2002), although the lower expression of *MLH3* expression in mitotic cells (Brar et al., 2012; Primig et al., 2000) may also contribute.

Both VDE-induced and Spo11-induced COs form at significant frequencies in *mlh3Δ ssn* mutants, which lack all four of the HJ resolvase activities thought to function during meiosis (Figure 3, see also (Argueso et al., 2004; Zakharyevich et al., 2012). These residual crossovers may reflect the activity of a yet-unidentified JM resolvase; they may also reflect the production of half-crossovers by break-induced replication (Ho et al., 2010; Kogoma, 1996; Llorente et al., 2008) or by other mechanisms that do not involve dHJ-JM formation and resolution (Ho et al., 2010; Ivanov and Haber, 1995; Muñoz-Galván et al., 2012; Prado and Aguilera, 1995).

### **Genome-wide Spo11-DSBs promote VDE-initiated COs and are required for**

#### **chromosome context-dependent differentiation of VDE DSB repair**

In catalysis-null *spo11-Y135F* mutants, most VDE-DSBs are repaired by interhomolog recombination (Figure 4, Figure 4—figure supplement 2), indicating that a single DSB can efficiently search the meiotic nucleus for homology. However, VDE-promoted COs are substantially reduced in *spo11* mutants (Figure 4), as has been observed with HO endonuclease-induced meiotic recombination (Malkova et al., 2000). Moreover, in *spo11*

mutants, virtually all VDE-initiated COs are MutLy-independent (Figure 4, Figure 4—figure supplement 2). Because Hop1's occupancy of cohesin sites is not noticeably altered in *spo11-Y135F* mutants (Franz Klein, personal communication), these findings indicate that, in addition to the local effects of meiotic chromosome structure suggested above, CO formation is affected by processes that require Spo11-DSBs elsewhere in the genome.

Meiotic DSB repair occurs concurrently with homolog pairing and synapsis (Börner et al., 2004; Padmore et al., 1991), and efficient homolog synapsis requires wild-type DSB levels, indicating that multiple interhomolog interactions along a chromosome are needed for stable homolog pairing (Henderson and Keeney, 2004). To account for the reduced levels and MutLy-independence of VDE-initiated COs in *spo11* mutants, we suggest that a single VDE-DSB is not sufficient to promote stable homolog pairing, and that additional DSBs along a chromosome are needed to promote stable homolog pairing, which in turn is needed to form ZMM protein-containing structures that stabilize JMs and recruit MutLy.

However, the 140-190 Spo11-DSBs that form in each meiotic cell (Buhler et al., 2007; Martini et al., 2011; Pan et al., 2011) are also expected to induce a nucleus-wide DNA damage-response, and to compete with other DSBs for repair activities whose availability is limited, and both have the potential to alter recombination biochemistry at VDE-DSBs (Johnson et al., 2007; Neale et al., 2002). Thus, while we believe it likely that defects in homolog pairing and synapsis are responsible for the observed impact of *spo11* mutation on VDE-initiated CO formation, it remains possible that it is due to changes in DNA damage signaling, repair protein availability, or in other processes that are affected by global Spo11-DSB levels.

## Concluding remarks

We have provided evidence that structural features of the chromosome axis, in particular the enrichment for meiosis-specific axis proteins, create a local environment that directs recombination to “meiotic” biochemical pathways. In the remainder of the genome, biochemical processes more typical of mitotic recombination function. In other words, the transition to meiosis from the mitotic cell cycle does not require a global inhibition of “mitotic” recombination mechanisms, which remain active in the meiotic nucleus and have the capacity to act in recombination events that occur outside of the local “meiotic” structural context. It is well established that this local chromosome context influences the first step in meiotic recombination, Spo11-catalyzed DSB formation (Panizza et al., 2011; Prieler et al., 2005). Our work shows that it also influences the last, namely the resolution of recombination intermediates to form COs. It will be of considerable interest to determine if other critical steps in meiotic recombination, such as choice between sister and homolog as a DSB repair partner, are also influenced by local aspects of chromosome structure.

In the current work, we focused on correlations between local enrichment for the meiosis-specific axis protein Hop1 and Holliday junction resolution activity during CO formation. Other HORMA domain proteins, including HIM-3 and HTP-1/2/3 in *C. elegans*, ASY3 in *A. thaliana* and HORMAD1/2 in *M. musculus* also have been reported to regulate recombination and homolog pairing (Kim et al., 2014; Martinez-Perez and Villeneuve, 2005) (Ferdous et al., 2012; Fukuda et al., 2010; Wojtasz et al., 2009), suggesting that



HORMA domain proteins may provide a common basis for the chromosome context-dependent regulation of meiotic recombination pathways in eukaryotes.

## Materials and Methods

### Yeast strains

All yeast strains are of SK1 background (Kane and Roth, 1974), and were constructed by standard genetic crosses or by direct transformation. Genotypes and allele details are given in Supplementary Table 1. Recombination reporter inserts with *arg4-VRS103* contain a 73nt *VRS103* oligonucleotide containing the mutant VDE recognition sequence from the *VMA1-103* allele (Fukuda et al., 2007; Nogami et al., 2002) inserted at the *EcoRV* site in *ARG4* coding sequences within a pBR322-based plasmid with *URA* and *ARG4* sequences, inserted at the *URA3* and *HIS4* loci, as described (Wu and Lichten, 1995). Recombination reporter inserts with the cleavable *arg4-VRS* (Neale et al., 2002) were derived from similar inserts but with flanking repeat sequences removed, to prevent repair by single strand annealing (Pâques and Haber, 1999). This was done by replacing sequences upstream and downstream of *ARG4* with *natMX* (Goldstein and McCusker, 1999) and *K. lactis TRP1* sequences (Stark and Milner, 1989) respectively (see Supplementary Table 1 legend for details. The resulting *arg4-VRS* and *arg4-VRS103* inserts share 3.077 kb of homology.

VDE normally exists as an intein in the constitutively-expressed *VMA1* gene (Gimble and Thorner, 1993), resulting in low levels of DSB formation in presporulation cultures (data not shown), probably due to small amounts VDE incidentally imported to the nucleus

during mitotic growth (Nagai et al., 2003). To further restrict VDE DSB formation, strains were constructed in which *VDE* expression was copper-inducible. These strains contain  
 380 the *VMA1-103* allele (Nogami et al., 2002), which provides wild type *VMA1* function, but lacks the VDE intein and is resistant to cleavage by VDE. To make strains in which *VDE* expression was copper-inducible, *VDE* coding sequences on an *EcoRI* fragment from pY2181 (Nogami et al., 2002) (a generous gift from Drs. Satoru Nogami and Dr. Yoshikazu Ohya) were inserted downstream of the *CUP1* promoter in plasmid pHG40, which contains  
 385 the *kanMX* selectable marker and a ~1kb *CUP1* promoter fragment (Jin et al., 2009), to make pMJ920, which was then integrated at the *CUP1* locus.

### Sporulation

Yeast strains were grown in buffered liquid presporulation medium and shifted to sporulation medium as described (Goyon and Lichten, 1993), except that sporulation  
 390 medium contained 10uM CuSO<sub>4</sub> to induce *VDE* expression. All experiments were performed at 30°C. Independent experiments were performed either on different days, or on the same day with cultures derived from independent single colonies.

### DNA extraction and analysis

Genomic DNA was prepared as described (Allers and Lichten, 2000). Recombination  
 395 products were detected on Southern blots containing genomic DNA digested with *HindIII* and *VDE* (*PI-SceI*, New England Biolabs), using specific buffer for *PI-SceI*. Samples were heated to 65° C for 15 min before loading to disrupt VDE-DNA complexes; gels contained 0.5% agarose in 45 mM Tris Borate + 1 mM EDTA (1X TBE) and were run at 2 V/cm for 24-25 hours. DSBs were similarly detected on Southern blots, but were digested with *HindIII*

alone as previously described (Goldfarb and Lichten, 2010), and electrophoresis buffer was supplemented with 4mM MgCl<sub>2</sub>. Gels were transferred to membranes and hybridized with radioactive probe as described (Allers and Lichten, 2001a; 2001b), and were imaged and quantified using a Fuji FLA-5100 phosphorimager and ImageGauge 4.22 software. *HindIII*-*VDE* gel blots were probed with *ARG4* sequences from -430 to +63 nt relative to *ARG4* coding sequences (Probe 1, Figure 1). *HindIII* gel blots were probed with sequences from the *DED81* gene (+978 to +1650 nt relative to *DED81* coding sequence), which is immediately upstream of *ARG4* (Probe 2, Figure 2).

### Chromatin immunoprecipitation and quantitative PCR

Cells were formaldehyde-fixed by adding 840 µl of a 36.5-38% formaldehyde solution (Sigma) to 30 ml of meiotic cultures, incubating for 15 minutes at room temperature, and quenched by the addition of glycine to 125 mM. Cells were harvested by centrifugation, resuspended in 500 µl lysis buffer (from (Strahl-Bolsinger et al., 1997) except with 1mg/ml Bacitracin and cOmplete Roche protease inhibitor cocktail (1 tablet/10ml) as protease inhibitors) and lysed at 4°C via 10 cycles of vortexing on a FastPrep24 (MP Medical) at 4 M/sec for 40 secs, with 5 minute pauses between runs. Lysates were then sonicated to yield an average DNA size of 300 bp and clarified by centrifugation at 21,130 RCF for 20 minutes. 1/50<sup>th</sup> of the sample was removed as input, and 2µl of anti-Hop1 (a generous gift from Nancy Hollingsworth) was added to the remainder (~490 µl) and incubated with gentle agitation overnight at 4°C. Antibody complexes were purified by addition of 20 µl of 50% slurry of Gammabind G Sepharose beads (GE healthcare), with further incubation for 3 hours at 4°C, followed by pelleting at 845 RCF for 30 seconds. Beads were then washed

and processed for DNA extraction as described (Blitzblau et al., 2012; Orlando and Paro, 1993; Andreas Hochwagen, personal communication).

qPCR analysis of purified DNA from input and immunoprecipitated samples used primer  
 425 pairs that amplify two regions (chromosome III coordinates 65350-65547 and 68072-  
 68271, *Saccharomyces* Genome Database release # R64-2-1) flanking the *HIS4* gene, and  
 two regions (chromosome V coordinates 115119-115317 and 117728-117922) flanking  
 the *URA3* gene (see Figure 1--figure supplement 1). Primers and genomic DNA from input  
 and immunoprecipitated samples were mixed with iQ SYBR green supermix (Biorad) and  
 430 analyzed using a Biorad iCycler.

## Acknowledgements

We thank Robert Shroff, Anuradha Sourirajan, Satoru Nogami, Yoshikazu Ohya, and Nancy  
 Hollingsworth for strains and reagents, Andreas Hochwagen and Franz Klein for  
 communicating unpublished information, and Dhruba Chatteraj, Julie Cooper, and Alex  
 435 Kelly for comments on the manuscript.

## References

Allers, T., Lichten, M., 2000. A method for preparing genomic DNA that restrains branch  
 migration of Holliday junctions. *Nucleic Acids Res* 28, e6.

Allers, T., Lichten, M., 2001a. Differential timing and control of noncrossover and crossover  
 440 recombination during meiosis. *Cell* 106, 47–57.

Allers, T., Lichten, M., 2001b. Intermediates of yeast meiotic recombination contain

heteroduplex DNA. Mol Cell 8, 225–231.

Argueso, J.L., Smith, D., Yi, J., Waase, M., Sarin, S., Alani, E., 2002. Analysis of conditional mutations in the *Saccharomyces cerevisiae* *MLH1* gene in mismatch repair and in

445 meiotic crossing over. Genetics 160, 909–921.

Argueso, J.L., Wanat, J., Gemici, Z., Alani, E., 2004. Competing crossover pathways act during meiosis in *Saccharomyces cerevisiae*. Genetics 168, 1805–1816.

Baudat, F., Nicolas, A., 1997. Clustering of meiotic double-strand breaks on yeast chromosome III. Proc Natl Acad Sci USA 94, 5213–5218.

450 Bishop, D.K., Zickler, D., 2004. Early decision; meiotic crossover interference prior to stable strand exchange and synapsis. Cell 117, 9–15.

Blat, Y., Protacio, R.U., Hunter, N., Kleckner, N., 2002. Physical and functional interactions among basic chromosome organizational features govern early steps of meiotic chiasma formation. Cell 111, 791–802.

455 Blitzblau, H.G., Bell, G.W., Rodriguez, J., Bell, S.P., Hochwagen, A., 2007. Mapping of meiotic single-stranded DNA reveals double-stranded-break hotspots near centromeres and telomeres. Curr Biol 17, 2003–2012.

Blitzblau, H.G., Chan, C.S., Hochwagen, A., Bell, S.P., 2012. Separation of DNA replication from the assembly of break-competent meiotic chromosomes. PLoS Genet 8, e1002643.

460 Borde, V., Wu, T.C., Lichten, M., 1999. Use of a recombination reporter insert to define meiotic recombination domains on chromosome III of *Saccharomyces cerevisiae*. Mol Cell Biol 19, 4832–4842.

Bowring, F.J., Yeadon, P.J., Stainer, R.G., Catchside, D.E.A., 2006. Chromosome pairing and meiotic recombination in *Neurospora crassa* *spo11* mutants. Curr Genet 50, 115–123.

- 465 Börner, G.V., Barot, A., Kleckner, N., 2008. Yeast Pch2 promotes domainal axis organization,  
timely recombination progression, and arrest of defective recombinosomes during  
meiosis. *Proc Natl Acad Sci USA* 105, 3327–3332.
- Börner, G.V., Kleckner, N., Hunter, N., 2004. Crossover/noncrossover differentiation,  
synaptonemal complex formation, and regulatory surveillance at the  
470 leptotene/zygotene transition of meiosis. *Cell* 117, 29–45.
- Brar, G.A., Yassour, M., Friedman, N., Regev, A., Ingolia, N.T., Weissman, J.S., 2012. High-  
resolution view of the yeast meiotic program revealed by ribosome profiling. *Science*  
335, 552–557.
- Buhler, C., Borde, V., Lichten, M., 2007. Mapping meiotic single-strand DNA reveals a new  
475 landscape of DNA double-strand breaks in *Saccharomyces cerevisiae*. *Plos Biol* 5, e324.
- Bzymek, M., Thayer, N.H., Oh, S.D., Kleckner, N., Hunter, N., 2010. Double Holliday junctions  
are intermediates of DNA break repair. *Nature* 464, 937–941.
- Cao, L., Alani, E., Kleckner, N., 1990. A pathway for generation and processing of double-  
strand breaks during meiotic recombination in *S. cerevisiae*. *Cell* 61, 1089–1101.
- 480 Carballo, J.A., Johnson, A.L., Sedgwick, S.G., Cha, R.S., 2008. Phosphorylation of the axial  
element protein Hop1 by Mec1/Tel1 ensures meiotic interhomolog recombination. *Cell*  
132, 758–770.
- Cartagena-Lirola, H., Guerini, I., Manfrini, N., Lucchini, G., Longhese, M.P., 2008. Role of the  
*Saccharomyces cerevisiae* Rad53 checkpoint kinase in signaling double-strand breaks  
485 during the meiotic cell cycle. *Mol Cell Biol* 28, 4480–4493.
- Celerin, M., Merino, S.T., Stone, J.E., Menzie, A.M., Zolan, M.E., 2000. Multiple roles of Spo11  
in meiotic chromosome behavior. *EMBO J* 19, 2739–2750.

de los Santos, T., Hunter, N., Lee, C., Larkin, B., Loidl, J., Hollingsworth, N.M., 2003. The  
Mus81/Mms4 endonuclease acts independently of double-Holliday junction resolution  
490 to promote a distinct subset of crossovers during meiosis in budding yeast. *Genetics*  
164, 81–94.

De Muyt, A., Jessop, L., Kolar, E., Sourirajan, A., Chen, J., Dayani, Y., Lichten, M., 2012. BLM  
helicase ortholog Sgs1 is a central regulator of meiotic recombination intermediate  
metabolism. 46, 43–53.

495 Dernburg, A.F., McDonald, K., Moulder, G., Barstead, R., Dresser, M., Villeneuve, A.M., 1998.  
Meiotic recombination in *C. elegans* initiates by a conserved mechanism and is  
dispensable for homologous chromosome synapsis. *Cell* 94, 387–398.

Fabre, F., Boulet, A., Roman, H., 1984. Gene conversion at different points in the mitotic  
cycle of *Saccharomyces cerevisiae*. *Mol Gen Genet* 195, 139–143.

500 Falque, M., Anderson, L.K., Stack, S.M., Gauthier, F., Martin, O.C., 2009. Two types of meiotic  
crossovers coexist in maize. *Plant Cell* 21, 3915–3925.

Ferdous, M., Higgins, J.D., Osman, K., Lambing, C., Roitinger, E., Mechtler, K., Armstrong, S.J.,  
Perry, R., Pradillo, M., Cunado, N., Franklin, F.C.H., 2012. Inter-homolog crossing-over  
and synapsis in *Arabidopsis* meiosis are dependent on the chromosome axis protein  
505 *AtASY3*. *PLoS Genet* 8.

Fogel, S., Mortimer, R., Lusnak, K., Tavares, F., 1979. Meiotic gene conversion: a signal of the  
basic recombination event in yeast. *Cold Spring Harbor Symp Quant Biol* 43 Pt 2, 1325–  
1341.

Fowler, K.R., Gutiérrez-Velasco, S., Martín-Castellanos, C., Smith, G.R., 2013. Protein  
510 determinants of meiotic DNA break hot spots. 49, 983–996.

Franklin, F.C.H., Higgins, J.D., Sanchez-Moran, E., Armstrong, S.J., Osman, K.E., Jackson, N.,

Jones, G.H., 2006. Control of meiotic recombination in *Arabidopsis*: role of the MutL and MutS homologues. *Biochem Soc Trans* 34, 542–544.

Fukuda, T., Daniel, K., Wojtasz, L., Tóth, A., Höög, C., 2010. A novel mammalian HORMA

515 domain-containing protein, HORMAD1, preferentially associates with unsynapsed meiotic chromosomes. *Exp Cell Res* 316, 158–171.

Fukuda, T., Kugou, K., Sasanuma, H., Shibata, T., Ohta, K., 2008. Targeted induction of meiotic double-strand breaks reveals chromosomal domain-dependent regulation of Spo11 and interactions among potential sites of meiotic recombination. *Nucleic Acids*

520 *Res* 36, 984–997.

Fukuda, T., Nogami, S., Ohya, Y., 2003. VDE-initiated intein homing in *Saccharomyces cerevisiae* proceeds in a meiotic recombination-like manner. *Genes Cells* 8, 587–602.

Fukuda, T., Ohya, Y., Ohta, K., 2007. Conditional genomic rearrangement by designed meiotic recombination using VDE (PI-SceI) in yeast. *Mol Genet Genomics* 278, 467–478.

525 Gerton, J.L., DeRisi, J., Shroff, R., Lichten, M., Brown, P.O., Petes, T.D., 2000. Global mapping of meiotic recombination hotspots and coldspots in the yeast *Saccharomyces cerevisiae*. *Proc Natl Acad Sci USA*. 97, 11383–11390.

Gimble, F.S., Thorner, J., 1992. Homing of a DNA endonuclease gene by meiotic gene conversion in *Saccharomyces cerevisiae*. *Nature* 357, 301–306.

530 Gimble, F.S., Thorner, J., 1993. Purification and characterization of VDE, a site-specific endonuclease from the yeast *Saccharomyces cerevisiae*. *J Biol Chem* 268, 21844–21853.

Goldfarb, T., Lichten, M., 2010. Frequent and efficient use of the sister chromatid for DNA double-strand break repair during budding yeast meiosis. *Plos Biol* 8, e1000520.



Goldstein, A.L., McCusker, J.H., 1999. Three new dominant drug resistance cassettes for  
535 gene disruption in *Saccharomyces cerevisiae*. Yeast 15, 1541–1553.

Goodyer, W., Kaitna, S., Couteau, F., Ward, J.D., Boulton, S.J., Zetka, M., 2008. HTP-3 links  
DSB formation with homolog pairing and crossing over during *C. elegans* meiosis. Devel  
Cell 14, 263–274.

Goyon, C., Lichten, M., 1993. Timing of molecular events in meiosis in *Saccharomyces*  
540 *cerevisiae*: stable heteroduplex DNA is formed late in meiotic prophase. Mol Cell Biol  
13, 373–382.

Hassold, T., Hansen, T., Hunt, P., VandeVoort, C., 2009. Cytological studies of recombination  
in rhesus males. Cytogenet Genome Res 124, 132–138.

Hellsten, U., Wright, K.M., Jenkins, J., Shu, S., Yuan, Y., Wessler, S.R., Schmutz, J., Willis, J.H.,

545 Rokhsar, D.S., 2013. Fine-scale variation in meiotic recombination in *Mimulus* inferred  
from population shotgun sequencing. Proc Natl Acad Sci USA 110, 19478–19482.

Henderson, K.A., Keeney, S., 2004. Tying synaptonemal complex initiation to the formation  
and programmed repair of DNA double-strand breaks. Proc Natl Acad Sci USA 101,  
4519–4524.

550 Higgins, J.D., Buckling, E.F., Franklin, F.C.H., Jones, G.H., 2008. Expression and functional  
analysis of AtMUS81 in *Arabidopsis* meiosis reveals a role in the second pathway of  
crossing-over. Plant J 54, 152–162.

Ho, C.K., Mazón, G., Lam, A.F., Symington, L.S., 2010. Mus81 and Yen1 promote reciprocal  
exchange during mitotic recombination to maintain genome integrity in budding yeast  
555 Mol Cell 40, 988–1000.

Hodgson, A., Terentyev, Y., Johnson, R.A., Bishop-Bailey, A., Angevin, T., Croucher, A.,

Goldman, A.S.H., 2011. Mre11 and Exo1 contribute to the initiation and processivity of resection at meiotic double-strand breaks made independently of Spo11. *DNA Repair* 10, 138–148.

560 Hollingsworth, N.M., Brill, S.J., 2004. The Mus81 solution to resolution: generating meiotic crossovers without Holliday junctions. *Genes Devel* 18, 117–125.

Hollingsworth, N.M., Goetsch, L., Byers, B., 1990. The *HOP1* gene encodes a meiosis-specific component of yeast chromosomes. *Cell* 61, 73–84.

Holloway, J.K., Booth, J., Edelman, W., McGowan, C.H., Cohen, P.E., 2008. MUS81 generates  
565 a subset of MLH1-MLH3-Independent crossovers in mammalian meiosis. *PLoS Genet* 4.

Hunter, N., 2015. Meiotic recombination: the essence of heredity. *Cold Spring Harb Perspect Biol* 7, a016618.

Ira, G., Malkova, A., Liberi, G., Foiani, M., Haber, J.E., 2003. Srs2 and Sgs1-Top3 suppress crossovers during double-strand break repair in yeast. *Cell* 115, 401–411.

570 Ivanov, E.L., Haber, J.E., 1995. *RAD1* and *RAD10*, but not other excision repair genes, are required for double-strand break-induced recombination in *Saccharomyces cerevisiae*. *Mol Cell Biol* 15, 2245–2251.

Jin, H., Guacci, V., Yu, H.-G., 2009. Pds5 is required for homologue pairing and inhibits synapsis of sister chromatids during yeast meiosis. *J Cell Biol* 186, 713–725.

575 Johnson, R., Borde, V., Neale, M.J., Bishop-Bailey, A., North, M., Harris, S., Nicolas, A., Goldman, A.S.H., 2007. Excess single-stranded DNA inhibits meiotic double-strand break repair. *PLoS Genet* 3, 2338–2349.

Joshi, N., Barot, A., Jamison, C., Boerner, G.V., 2009. Pch2 links chromosome axis remodeling at future crossover sites and crossover distribution during yeast meiosis. *PLoS Genet* 5,

580 e1000557.

Kadyk, L.C., Hartwell, L.H., 1992. Sister chromatids are preferred over homologs as substrates for recombinational repair in *Saccharomyces cerevisiae*. *Genetics* 132, 387–402.

Kane, S.M., Roth, R., 1974. Carbohydrate metabolism during ascospore development in yeast. *J Bacteriol* 118, 8–14.

585 Kelly, P.T., 1974. Non-reciprocal intragenic mitotic recombination in *Drosophila melanogaster*. *Genet Res* 23, 1–12.

Khazanehdari, K.A., Borts, R.H., 2000. *EXO1* and *MSH4* differentially affect crossing-over and segregation. *Chromosoma* 109, 94–102.

590 Kim, Y., Rosenberg, S.C., Kugel, C.L., Kostow, N., Rog, O., Davydov, V., Su, T.Y., Dernburg, A.F., Corbett, K.D., 2014. The chromosome axis controls meiotic events through a hierarchical assembly of HORMA domain proteins. *Devel Cell* 31, 487–502.

Kochakpour, N., Moens, P.B., 2008. Sex-specific crossover patterns in Zebrafish (*Danio rerio*). *Heredity* 100, 489–495.

595 Kogoma, T., 1996. Recombination by replication. *Cell* 85, 625–627.

Lam, I., Keeney, S., 2015. Mechanism and regulation of meiotic recombination initiation. *Cold Spring Harb Perspect Biol* 7, a016634.

Lao, J.P., Cloud, V., Huang, C.-C., Grubb, J., Thacker, D., Lee, C.-Y., Dresser, M.E., Hunter, N., Bishop, D.K., 2013. Meiotic crossover control by concerted action of Rad51-Dmc1 in homolog template bias and robust homeostatic regulation. *PLoS Genet* 9.

600 Lhuissier, F.G.P., Offenberger, H.H., Wittich, P.E., Vischer, N.O.E., Heyting, C., 2007. The mismatch repair protein MLH1 marks a subset of strongly interfering crossovers in

tomato. *Plant Cell* 19, 862–876.

Llorente, B., Smith, C.E., Symington, L.S., 2008. Break-induced replication: what is it and

605 what is it for? *Cell Cycle* 7, 859–864.

Loidl, J., Mochizuki, K., 2009. *Tetrahymena* meiotic nuclear reorganization is induced by a checkpoint kinase-dependent response to DNA damage. *Mol Biol Cell* 20, 2428–2437.

Lynn, A., Soucek, R., Börner, G.V., 2007. ZMM proteins during meiosis: crossover artists at work. *Chromosome Res* 15, 591–605.

610 Malkova, A., Klein, F., Leung, W.Y., Haber, J.E., 2000. HO endonuclease-induced recombination in yeast meiosis resembles Spo11-induced events. *Proc Natl Acad Sci USA* 97, 14500–14505.

Martinez-Perez, E., Villeneuve, A.M., 2005. HTP-1-dependent constraints coordinate homolog pairing and synapsis and promote chiasma formation during *C. elegans* meiosis. *Genes Devel* 19, 2727–2743.

615 Martini, E., Borde, V., Legendre, M., Audic, S., Regnault, B., Soubigou, G., Dujon, B., Llorente, B., 2011. Genome-wide analysis of heteroduplex dna in mismatch repair-deficient yeast cells reveals novel properties of meiotic recombination pathways. *PLoS Genet* 7, e1002305.

620 Martini, E., Diaz, R.L., Hunter, N., Keeney, S., 2006. Crossover homeostasis in yeast meiosis. *Cell* 126, 285–295.

McGill, C., Shafer, B., Strathern, J., 1989. Coconversion of flanking sequences with homothallic switching. *Cell* 57, 459–467.

McMahill, M.S., Sham, C.W., Bishop, D.K., 2007. Synthesis-dependent strand annealing in meiosis. *Plos Biol* 5, 2589–2601.

625

Mitchel, K., Lehner, K., Jinks-Robertson, S., 2013. Heteroduplex DNA position defines the roles of the Sgs1, Srs2, and Mph1 helicases in promoting distinct recombination outcomes. *PLoS Genet* 9, e1003340.

Muñoz-Galván, S., Tous, C., Blanco, M.G., Schwartz, E.K., Ehmsen, K.T., West, S.C., Heyer, W.-  
630 D., Aguilera, A., 2012. Distinct roles of Mus81, Yen1, Slx1-Slx4, and Rad1 nucleases in the repair of replication-born double-strand breaks by sister chromatid exchange. *Mol Cell Biol* 32, 1592–1603.

Nagai, Y., Nogami, S., Kumagai-Sano, F., Ohya, Y., 2003. Karyopherin-mediated nuclear import of the homing endonuclease *VMA1*-derived endonuclease is required for self-  
635 propagation of the coding region. *Mol Cell Biol* 23, 1726–1736.

Neale, M.J., Ramachandran, M., Trelles-Sticken, E., Scherthan, H., Goldman, A., 2002. Wild-type levels of Spo11-induced DSBs are required for normal single-strand resection during meiosis *Mol Cell* 9, 835–846.

Niu, H., Wan, L., Baumgartner, B., Schaefer, D., Loidl, J., Hollingsworth, N.M., 2005. Partner  
640 choice during meiosis is regulated by Hop1-promoted dimerization of Mek1. *Mol Biol Cell* 16, 5804–5818.

Nogami, S., Fukuda, T., Nagai, Y., Yabe, S., Sugiura, M., Mizutani, R., Satow, Y., Anraku, Y.,  
Ohya, Y., 2002. Homing at an extragenic locus mediated by VDE (PI-SceI) in *Saccharomyces cerevisiae*. *Yeast* 19, 773–782.

645 Orlando, V., Paro, R., 1993. Mapping Polycomb-repressed domains in the bithorax complex using in vivo formaldehyde cross-linked chromatin. *Cell* 75, 1187–1198.

Padmore, R., Cao, L., Kleckner, N., 1991. Temporal comparison of recombination and synaptonemal complex formation during meiosis in *S. cerevisiae*. *Cell* 66, 1239–1256.

Page, S.L., Hawley, R.S., 2004. The genetics and molecular biology of the synaptonemal  
650 complex. *Annu Rev Cell Dev Biol* 20, 525–558.

Pan, J., Sasaki, M., Kniewel, R., Murakami, H., Blitzblau, H.G., Tischfield, S.E., Zhu, X., Neale,  
M.J., Jasin, M., Socci, N.D., Hochwagen, A., Keeney, S., 2011. A Hierarchical combination  
of factors shapes the genome-wide topography of yeast meiotic recombination  
initiation. *Cell* 144, 719–731.

655 Panizza, S., Mendoza, M.A., Berlinger, M., Huang, L., Nicolas, A., Shirahige, K., Klein, F., 2011.  
Spo11-accessory proteins link double-strand break sites to the chromosome axis in  
early meiotic recombination. *Cell* 146, 372–383.

Pauklin, S., Burkert, J.S., Martin, J., Osman, F., Weller, S., Boulton, S.J., Whitby, M.C., Petersen-  
Mahrt, S.K., 2009. Alternative induction of meiotic recombination from single-base  
660 lesions of DNA deaminases. *Genetics* 182, 41–54.

Pâques, F., Haber, J.E., 1999. Multiple pathways of recombination induced by double-strand  
breaks in *Saccharomyces cerevisiae*. *Microbiol Molec Biol Rev* 63, 349–404.

Pâques, F., Leung, W.Y., Haber, J.E., 1998. Expansions and contractions in a tandem repeat  
induced by double-strand break repair. *Mol Cell Biol* 18, 2045–2054.

665 Plug, A.W., Peters, A.H., Keegan, K.S., Hoekstra, M.F., De Boer, P., Ashley, T., 1998. Changes in  
protein composition of meiotic nodules during mammalian meiosis. *J Cell Sci* 111, 413–  
423.

Prado, F., Aguilera, A., 1995. Role of reciprocal exchange, one-ended invasion crossover and  
single-strand annealing on inverted and direct repeat recombination in yeast: different  
670 requirements for the *RAD1*, *RAD10*, and *RAD52* genes. *Genetics* 139, 109–123.

Pratto, F., Brick, K., Khil, P., Smagulova, F., Petukhova, G.V., Camerini-Otero, R.D., 2014.

Recombination initiation maps of individual human genomes. *Science* 346, 1256442.

Prieler, S., Penkner, A., Borde, V., Klein, F., 2005. The control of Spo11's interaction with meiotic recombination hotspots. *Genes Devel* 19, 255–269.

675 Primig, M., Williams, R.M., Winzeler, E.A., Tevzadze, G.G., Conway, A.R., Hwang, S.Y., Davis, R.W., Esposito, R.E., 2000. The core meiotic transcriptome in budding yeasts. *Nat Genet* 26, 415–423.

Rosenberg, S.C., Corbett, K.D., 2015. The multifaceted roles of the HORMA domain in cellular signaling. *J Cell Biol* 211, 745–755.

680 Schwacha, A., Kleckner, N., 1994. Identification of joint molecules that form frequently between homologs but rarely between sister chromatids during yeast meiosis. *Cell* 76, 51–63.

Schwacha, A., Kleckner, N., 1997. Interhomolog bias during meiotic recombination: meiotic functions promote a highly differentiated interhomolog-only pathway. *Cell* 90, 1123–  
685 1135.

Serrentino, M.-E., Chaplais, E., Sommermeyer, V., Borde, V., 2013. Differential association of the conserved SUMO ligase Zip3 with meiotic double-strand break sites reveals regional variations in the outcome of meiotic recombination. *PLoS Genet* 9, e1003416.

Singhal, S., Leffler, E.M., Sannareddy, K., Turner, I., Venn, O., Hooper, D.M., Strand, A.I., Li, Q.,  
690 Raney, B., Balakrishnan, C.N., Griffith, S.C., McVean, G., Przeworski, M., 2015. Stable recombination hotspots in birds. *Science* 350, 928–932.

Smagulova, F., Gregoret, I.V., Brick, K., Khil, P., Camerini-Otero, R.D., Petukhova, G.V., 2011. Genome-wide analysis reveals novel molecular features of mouse recombination hotspots. *Nature* 472, 375–378.

695 Smith, A.V., Roeder, G.S., 1997. The yeast Red1 protein localizes to the cores of meiotic  
chromosomes. *J Cell Biol* 136, 957–967.

Sourirajan, A., Lichten, M., 2008. Polo-like kinase Cdc5 drives exit from pachytene during  
budding yeast meiosis. *Genes Devel* 22, 2627–2632.

Stark, J.M., Jasin, M., 2003. Extensive loss of heterozygosity is suppressed during  
700 homologous repair of chromosomal breaks. *Mol Cell Biol* 23, 733–743.

Stark, M.J., Milner, J.S., 1989. Cloning and analysis of the *Kluyveromyces lactis TRP1* gene: a  
chromosomal locus flanked by genes encoding inorganic pyrophosphatase and histone  
H3. *Yeast* 5, 35–50.

Storlazzi, A., Tessé, S., Gargano, S., James, F., Kleckner, N., Zickler, D., 2003. Meiotic double-  
705 strand breaks at the interface of chromosome movement, chromosome remodeling,  
and reductional division. *Genes Devel* 17, 2675–2687.

Strahl-Bolsinger, S., Hecht, A., Luo, K., Grunstein, M., 1997. SIR2 and SIR4 interactions differ  
in core and extended telomeric heterochromatin in yeast. *Genes Devel* 11, 83–93.

Sun, H., Treco, D., Schultes, N.P., Szostak, J.W., 1989. Double-strand breaks at an initiation  
710 site for meiotic gene conversion. *Nature* 338, 87–90.

Sym, M., Engebrecht, J.A., Roeder, G.S., 1993. ZIP1 is a synaptonemal complex protein  
required for meiotic chromosome synapsis. *Cell* 72, 365–378.

Taghian, D.G., Nickoloff, J.A., 1997. Chromosomal double-strand breaks induce gene  
conversion at high frequency in mammalian cells. *Mol Cell Biol* 17, 6386–6393.

715 Tease, C., Hultén, M.A., 2004. Inter-sex variation in synaptonemal complex lengths largely  
determine the different recombination rates in male and female germ cells. *Cytogenet  
Genome Res* 107, 208–215.



Terentyev, Y., Johnson, R., Neale, M.J., Khisroon, M., Bishop-Bailey, A., Goldman, A.S.H., 2010.

Evidence that *MEK1* positively promotes interhomologue double-strand break repair.

720 Nucleic Acids Res 38, 4349–4360.

Thorne, L.W., Byers, B., 1993. Stage-specific effects of X-irradiation on yeast meiosis.

Genetics 134, 29–42.

Vader, G., Blitzblau, H.G., Tame, M.A., Falk, J.E., Curtin, L., Hochwagen, A., 2011. Protection of repetitive DNA borders from self-induced meiotic instability. *Nature* 477, 115–119.

725 Virgin, J.B., Bailey, J.P., Hasteh, F., Neville, J., Cole, A., Tromp, G., 2001. Crossing over is rarely associated with mitotic intragenic recombination in *Schizosaccharomyces pombe*. *Genetics* 157, 63–77.

Wang, T.F., Kleckner, N., Hunter, N., 1999. Functional specificity of MutL homologs in yeast: Evidence for three Mlh1-based heterocomplexes with distinct roles during meiosis in recombination and mismatch correction. *Proc Natl Acad Sci USA* 96, 13914–13919.

730 Welz-Voegele, C., Stone, J.E., Tran, P.T., Kearney, H.M., Liskay, R.M., Petes, T.D., Jinks-Robertson, S., 2002. Alleles of the yeast Pms1 mismatch-repair gene that differentially affect recombination- and replication-related processes. *Genetics* 162, 1131–1145.

Wijnker, E., Velikkakam James, G., Ding, J., Becker, F., Klasen, J.R., Rawat, V., Rowan, B.A., de Jong, D.F., de Snoo, C.B., Zapata, L., Huettel, B., de Jong, H., Ossowski, S., Weigel, D., Koornneef, M., Keurentjes, J.J., Schneeberger, K., 2013. The genomic landscape of meiotic crossovers and gene conversions in *Arabidopsis thaliana*. *eLife* 2, e01426.

735 Wojtasz, L., Daniel, K., Roig, I., Bolcun-Filas, E., Xu, H., Boonsanay, V., Eckmann, C.R., Cooke, H.J., Jasin, M., Keeney, S., McKay, M.J., Tóth, A., 2009. Mouse HORMAD1 and HORMAD2, two conserved meiotic chromosomal proteins, are depleted from synapsed

740

chromosome axes with the help of TRIP13 AAA-ATPase. PLoS Genet 5, e1000702.

Wu, T.C., Lichten, M., 1995. Factors that affect the location and frequency of meiosis-induced double-strand breaks in *Saccharomyces cerevisiae*. Genetics 140, 55–66.

Wyatt, H.D.M., West, S.C., 2014. Holliday junction resolvases. Cold Spring Harb Perspect Biol 6, a023192.

Zakharyevich, K., Ma, Y., Tang, S., Hwang, P.Y.-H., Boiteux, S., Hunter, N., 2010. Temporally and biochemically distinct activities of Exo1 during meiosis: double-strand break resection and resolution of double Holliday junctions. Mol Cell 40, 1001–1015.

Zakharyevich, K., Tang, S., Ma, Y., Hunter, N., 2012. Delineation of joint molecule resolution pathways in meiosis identifies a crossover-specific resolvase. Cell 149, 334–347.

Zhang, L., Kim, K.P., Kleckner, N.E., Storlazzi, A., 2011. Meiotic double-strand breaks occur once per pair of (sister) chromatids and, via Mec1/ATR and Tel1/ATM, once per quartet of chromatids. Proc Natl Acad Sci USA 108, 20036–20041.

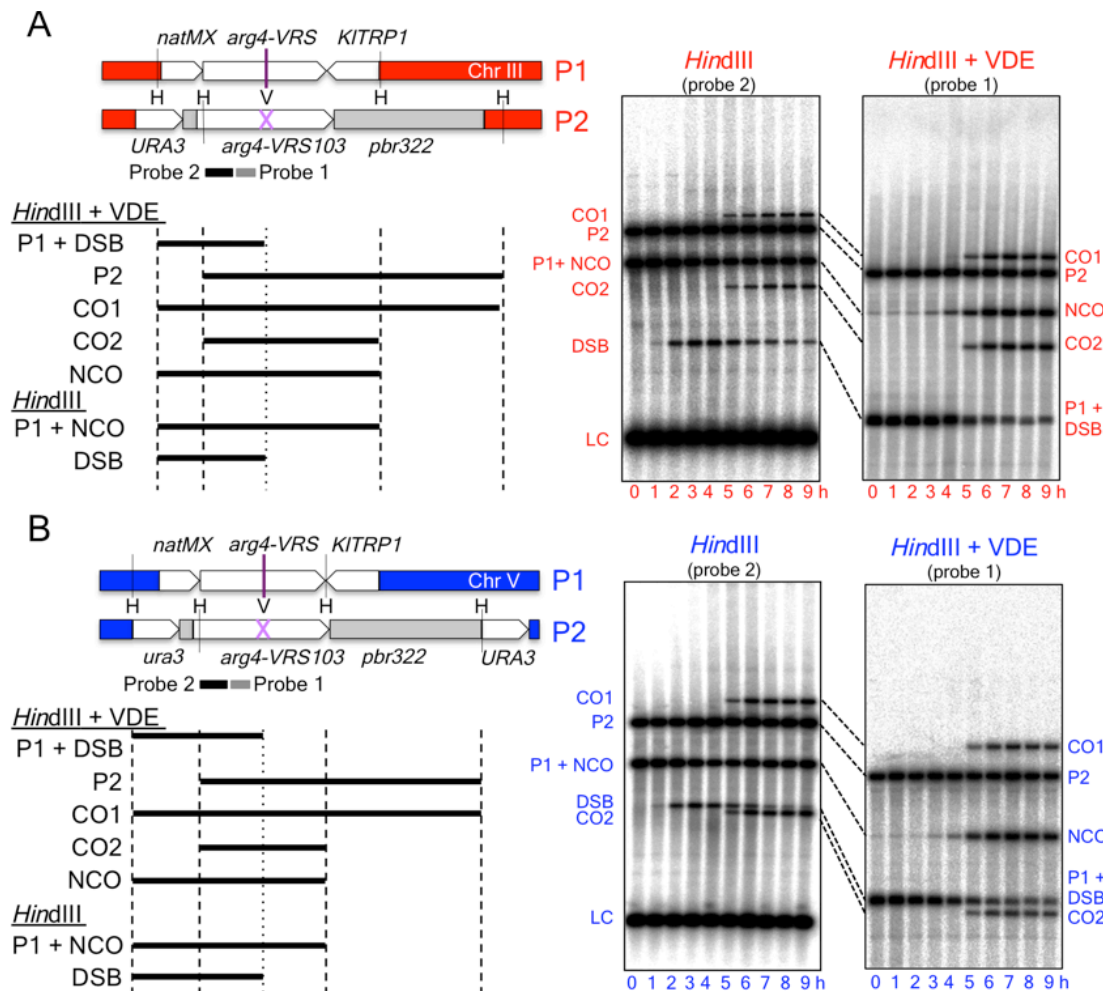

**Figure 1.** Inserts used to monitor VDE-initiated meiotic recombination. The *HIS4* and *URA3* loci are denoted throughout this paper in red and blue, respectively, and are in Red1/Hop1 enriched and depleted regions, respectively (see Figure 4A and Figure 4—figure supplement 1, below). (A) Left—map of VDE-reporter inserts at *HIS4*, showing digests used to detect recombination intermediates and products; right—representative Southern blots. One parent contains *ARG4* sequences with a VDE-recognition site (*arg4-VRS*), flanked by an noursesthracin-resistance module (*natMX*, Goldstein and McCusker, 1999) and the *Kluyveromyces lactis* *TRP1* gene (*KITRP1*, Stark and Milner, 1989); the other parent contains *ARG4* sequences with a mutant, uncuttable *VRS* site (*arg4-VRS103*, Nogami et al., 2002) flanked by *URA3* and pBR322 sequences. Digestion with *Hind*III (H) and VDE (V) allows detection of crossovers (CO1 and CO2) and noncrossovers (NCO); digestion with *Hind*III alone allows detection of crossovers and DSBs. The *Hind*III-alone blot has been probed with a fragment (probe 2) that hybridizes to the insert loci and to the native *ARG4* locus on chromosome VIII; this latter signal serves as a loading control (LC). Times after induction of meiosis that each sample was taken are indicated below each lane. (B) map of VDE-reporter inserts at *URA3* and representative Southern blots; details as in (A). Strain, insert and probe details are given in Materials and Methods and Supplementary Table 1.

The following figure supplement is available for Figure 1:

**Figure supplement 1.** Spo11-initiated events at the two insert loci.

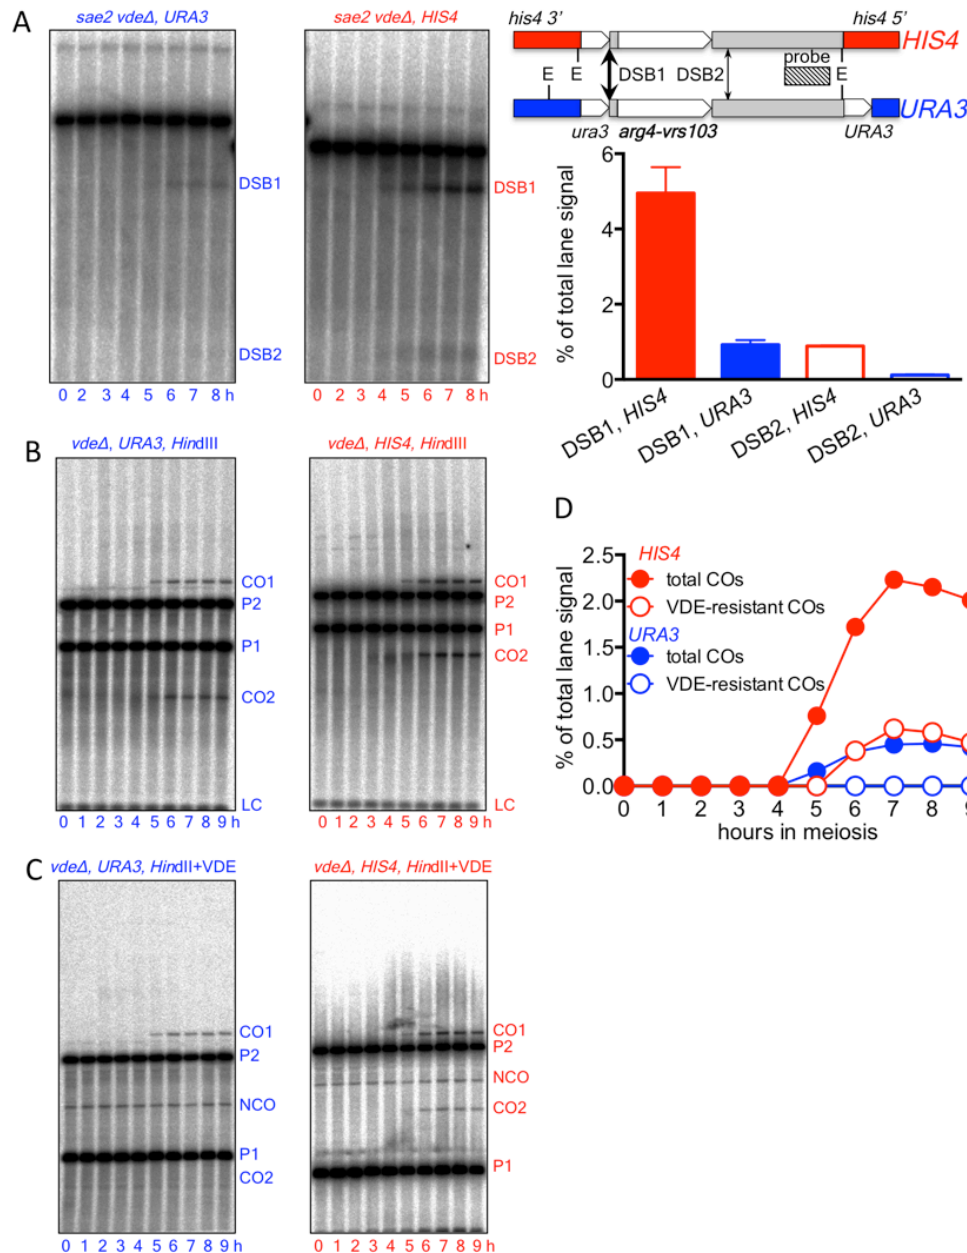

**Figure 1—figure supplement 1.** Spo11-initiated events at the two insert loci. **(A)** Spo11-catalyzed DSBs are more frequent in inserts at *HIS4* than at *URA3*. Left—Southern blots of *EcoRI* digests of DNA from strains lacking VDE, probed with pBR322 sequences, showing Spo11-DSBs in the Parent 2 insert (see Figure 1, main panel) in resection/repair-deficient *sae2Δ* mutant strains. Right—location of DSBs and probe and DSB frequencies (average of 7 and 8 h samples from a single experiment; error bars represent standard error of mean). **(B)** Southern blots of *HindIII* digests of DNA from strains lacking VDE, to detect total Spo11-initiated crossovers. **(C)** Southern blots of *HindIII*-VDE double digests of the same samples, to determine the background contribution of Spo11-initiated COs in subsequent experiments measuring VDE-initiated COs, which will be VDE-resistant due to conversion of the *VRS* site to *VRS103*. **(D)** Quantification of data in panels B (total COs) and C (VDE-resistant COs). Data are from a single experiment.

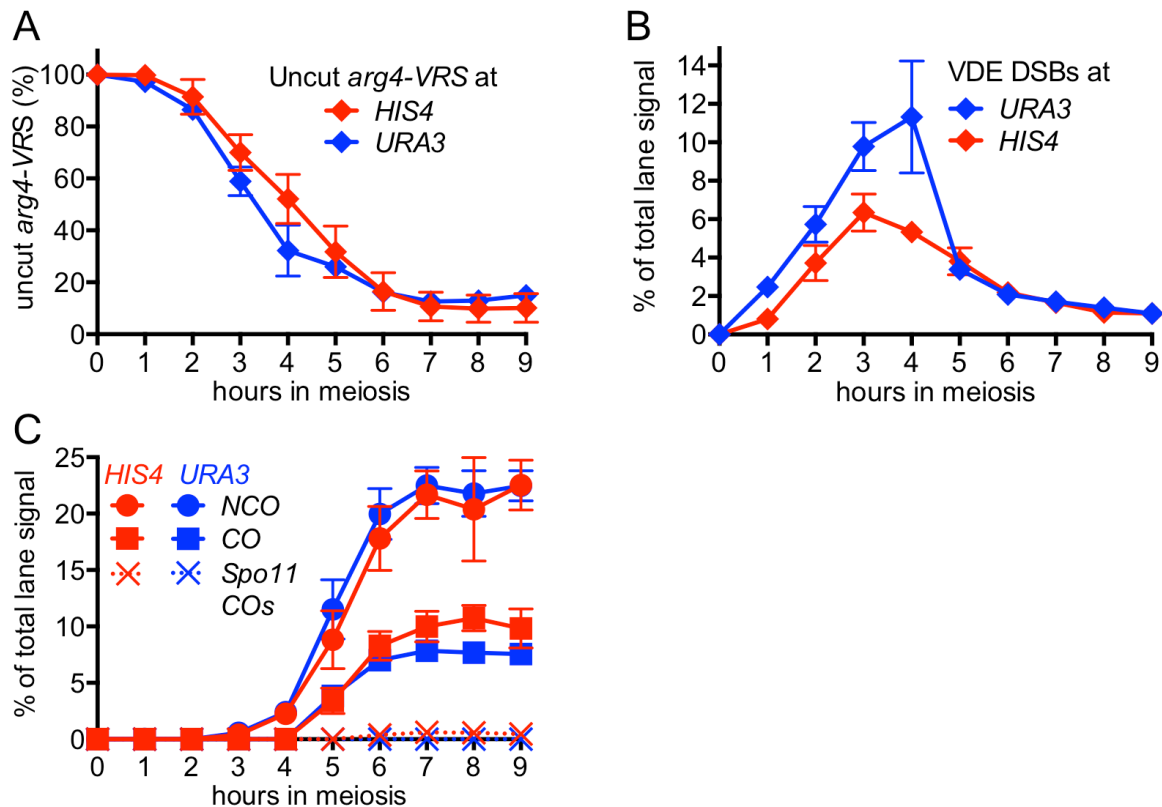

**Figure 2.** VDE-initiated recombination occurs at similar levels at the two insert loci. (A) Cumulative DSB levels are similar at the two insert loci. The fraction of uncut VRS-containing chromosomes (Parent 1) was determined by subtracting the amount of the NCO band in *Hind*III + VDE digests from the amount of the Parent 1 + NCO band in *Hind*III digests. (B) Non-cumulative VDE-DSB frequencies, measured as fraction of total lane signal in *Hind*III digests, excluding loading controls. (C) Crossover (average of CO1 and CO2) and noncrossover frequencies, measured in *Hind*III-VDE digests. Solid lines—recombinants from cells expressing VDE; dashed lines—*Spo11*-initiated crossovers from *vde*<sup>-</sup> strains, see also Figure 1—figure supplement 1. Values are the average of two independent experiments; error bars represent standard error of mean. For COs, error is calculated for the average values of CO1 and CO2 from both experiments. Representative Southern blots are shown in Figure 1 and Figure 1—figure supplement 1C. The following figure supplements is available for Figure 2: **Figure supplement 1.** 70-80% of VDE-DSBs are repaired.

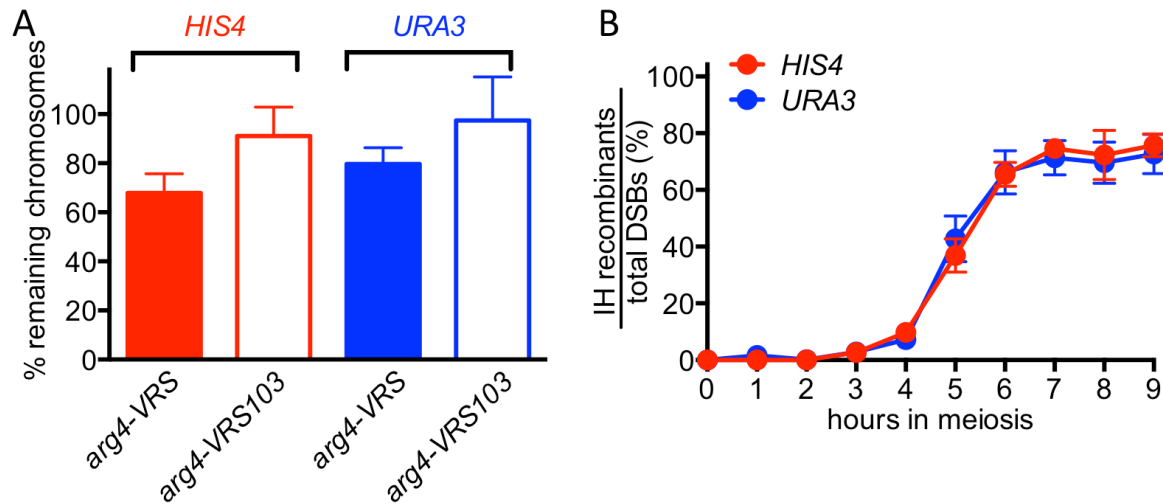

**Figure 2—figure supplement 1.** 70-80% of VDE-DSBs are repaired. **(A)** Fraction of inserts remaining, calculated using *Hind*III digests (see Figure 1). For the *arg4-VRS103* insert, the ratio (Parent 2 + CO2)/ (0.5 x LC) was calculated at 9 h, and was then normalized to the 0 h value. For the *arg4-VRS* insert, a similar calculation was made: (Parent 1 + NCO + CO1)/(0.5 x LC) **(B)** Relative recovery of interhomolog recombination products, calculated using *Hind*III-VDE double digests (see Figure 1). The sum of CO (average of CO1 and CO2) and NCO frequencies was divided by the frequency of total DSBs, as calculated in Figure 2A. Data are the average of two independent experiments; error bars represent standard error of mean.



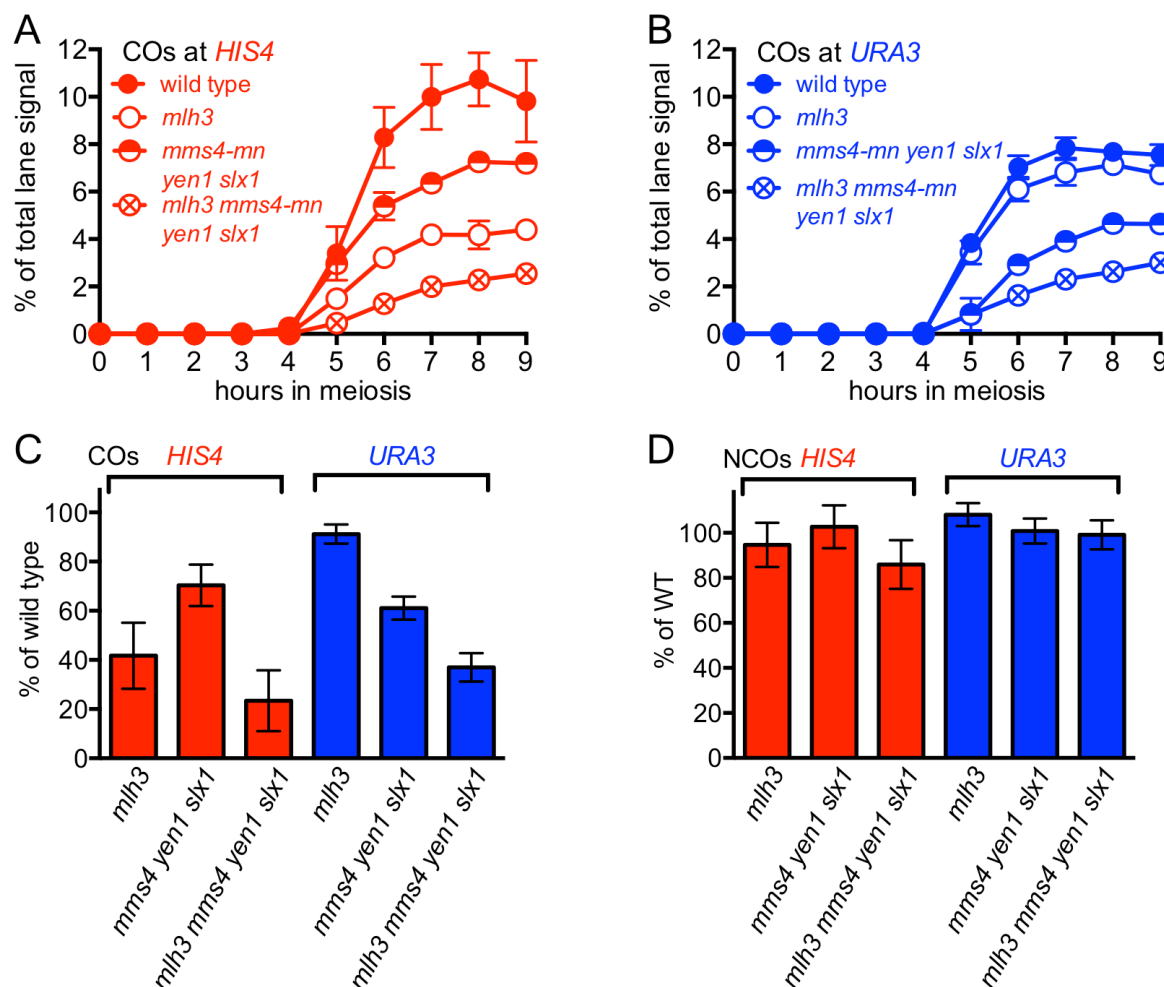

**Figure 3.** Different resolvase-dependence of crossover formation at the two insert loci. **(A)** Crossover frequencies (average of CO1 and CO2) measured as in Figure 2(C) from *HIS4* insert-containing mutants lacking MutLγ (*mlh3*), structure-selective nucleases (*mms4-mn yen1 slx1*) or both resolvase activities (*mlh3 mms4-mn yen1 slx1*). **(B)** Crossover frequencies in *URA3* insert-containing strains, measured as in panel A. Values are the average of two independent experiments; error bars represent standard error of mean (SEM). **(C)** Final crossover levels (average of 8 and 9 h values), expressed as percent of wild type. Note that, in *mlh3* mutants, crossovers in *HIS4* inserts are reduced more than two-fold, while crossovers in *URA3* inserts are reduced by less than 10%. **(D)** Final noncrossover levels (average of 8 and 9 h values), expressed as percent of wild type. Percent of wild type (WT) values are calculated from average values of two independent experiments; error bars are calculated as  $(SEM_{WT}/Average_{WT}) + (SEM_{mutant}/Average_{mutant})$ , normalized to 100%. Representative Southern blots are in Figure 3—figure supplement 2. The following figure supplements are available for Figure 3:

**Figure supplement 1.** VDE-DSB and NCO frequencies in resolvase mutants.

**Figure supplement 2.** Representative Southern blots.

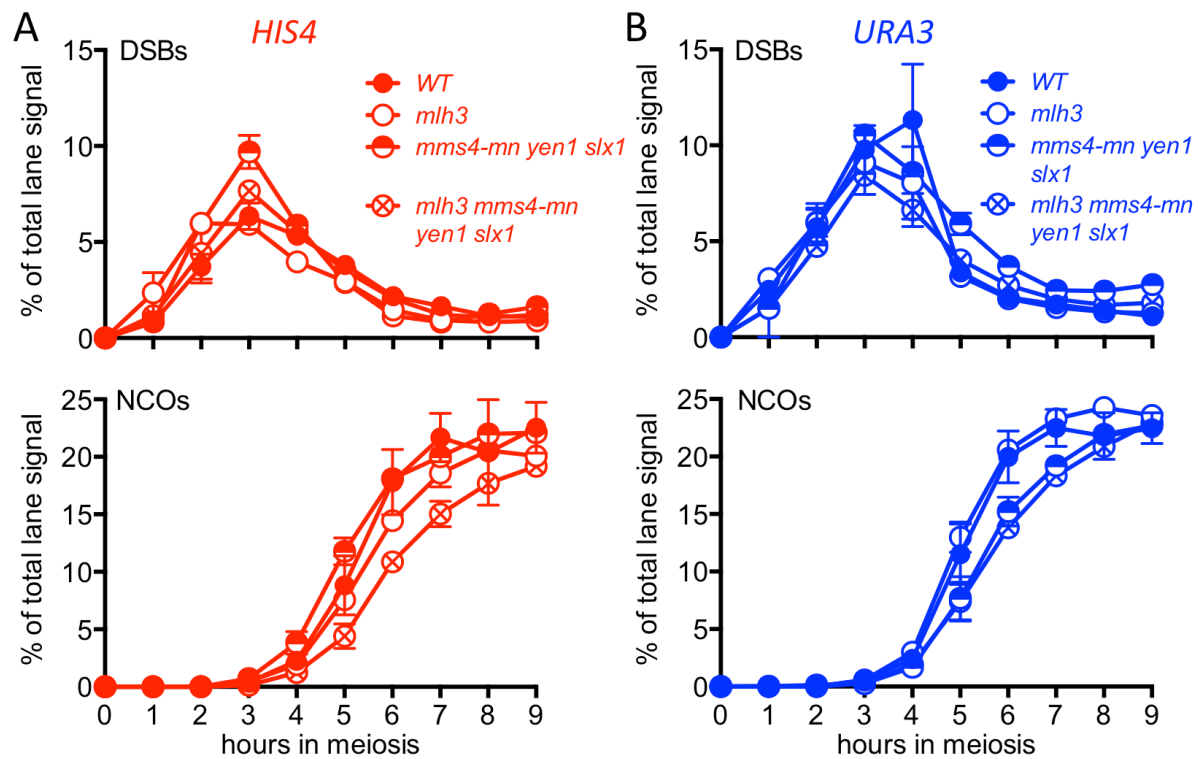

**Figure 3—figure supplement 1.** VDE-DSB and NCO frequencies in resolvase mutants. **(A)** VDE-DSB frequencies (top), measured as in Figure 2B, and NCO frequencies (bottom), measured as in Figure 2C, from *HIS4* insert-containing strains. **(B)** As panel A, with strains containing inserts at *URA3*. Data are the average of two independent experiments; error bars represent standard error of mean. Representative Southern blots are in Figure 3—figure supplement 2.



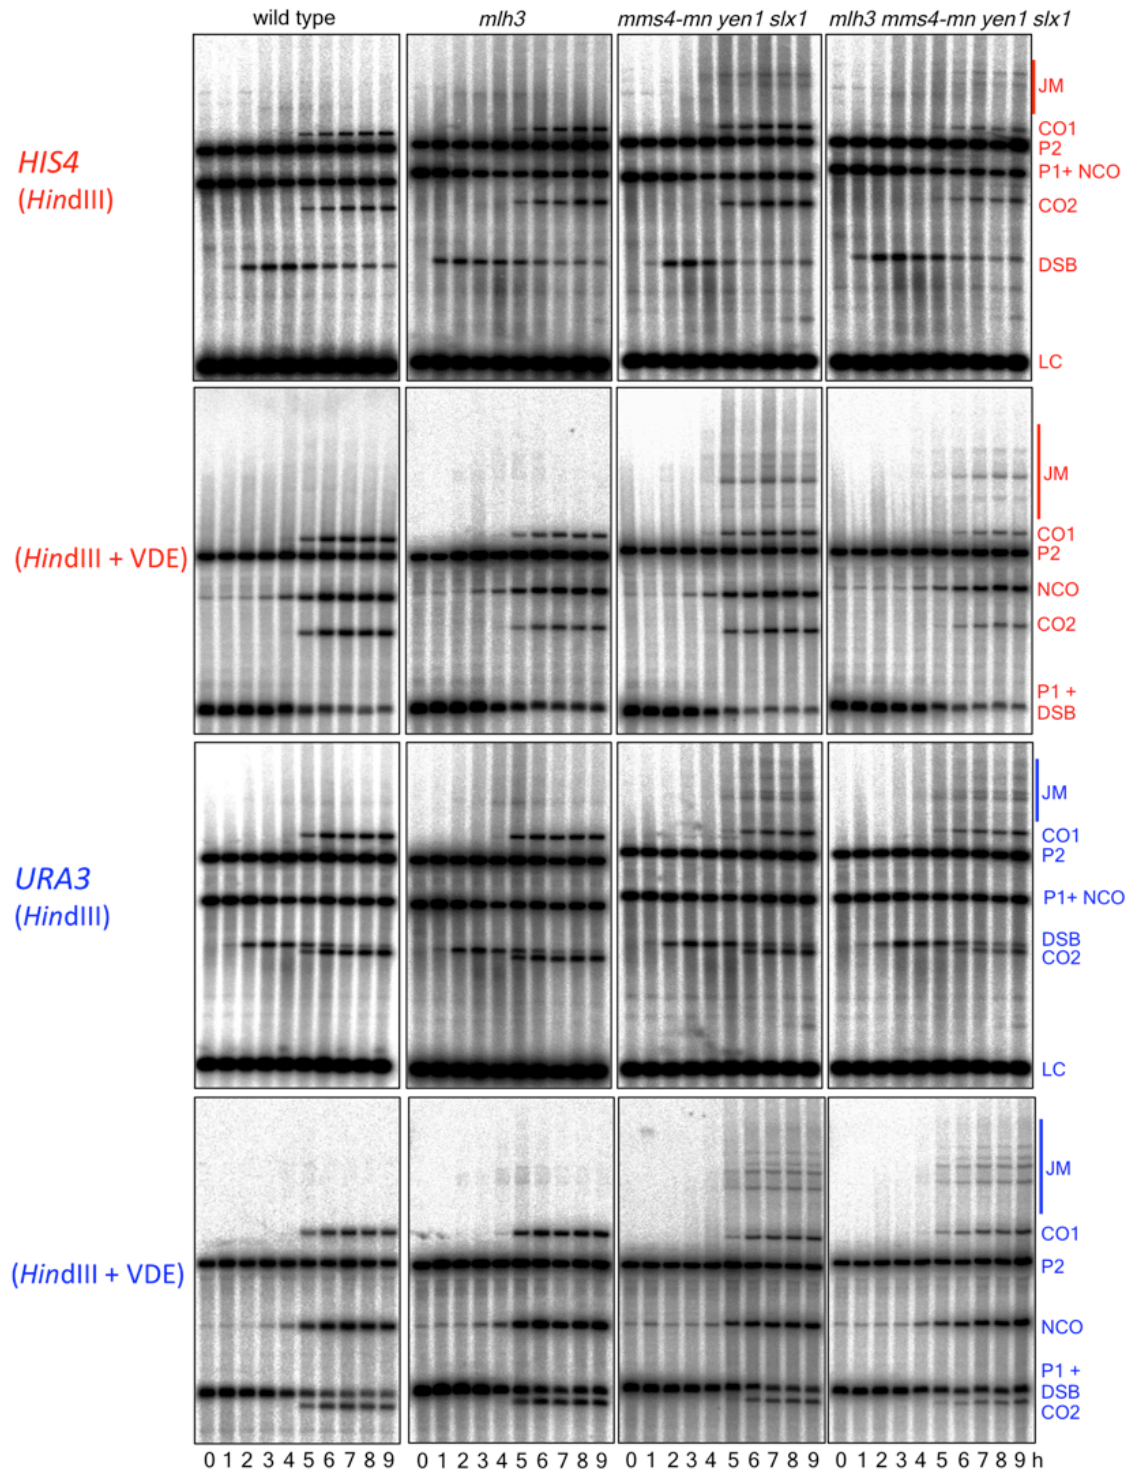

**Figure 3—figure supplement 2.** Representative Southern blots. Blots are of *HindIII* and *HindIII*-VDE digests of DNA from *HIS4* insert-containing strains (top) and from *URA3* insert-containing strains (bottom). Gel labels as in Figure 1; JM—joint molecule recombination intermediates.

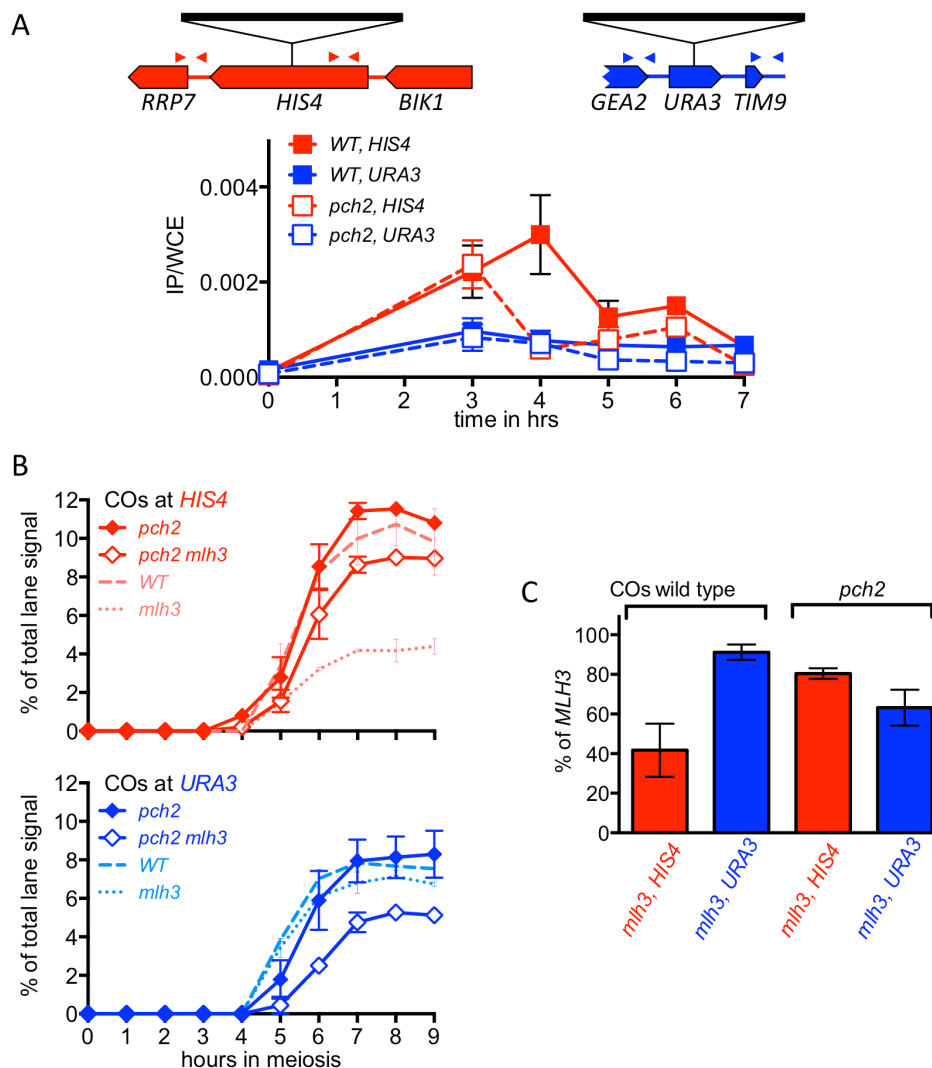

**Figure 4.** *pch2Δ* mutants display altered Hop1 occupancy and crossover MutLγ-dependence. **(A)** Hop1 occupancy at insert loci, determined by chromatin immunoprecipitation and quantitative PCR. Top—cartoon of insert loci, showing the location of primer pairs used. Bottom—relative Hop1 occupancy, expressed as the average ratio of immunoprecipitate/input extract for both primer pairs (see Materials and Methods for details). Values are the average of two independent experiments; error bars represent standard error of the mean. **(B)** VDE-initiated CO frequencies measured as in Figure 2(C) at *HIS4* (top) and *URA3* (bottom) in *pch2Δ* (solid diamonds) and *pch2Δ mlh3Δ* (open diamonds). Crossovers from wild type (dashed line) and *mlh3Δ* (dotted line) from Figure 3 are shown for comparison. Values are from two independent experiments; error bars represent standard error of the mean. Representative Southern blots are in Figure 4—figure supplement 2. **(C)** Extent of CO reduction in *mlh3Δ* mutants, relative to corresponding *MLH3* strains. *PCH2* genotype is indicated at the top; values and error bars are calculated as in Figure 3(C).

The following figure supplements are available for Figure 4:

**Figure supplement 1.** Hop1 occupancy, DSBs and NCOs.

**Figure supplement 2.** Representative Southern blots.

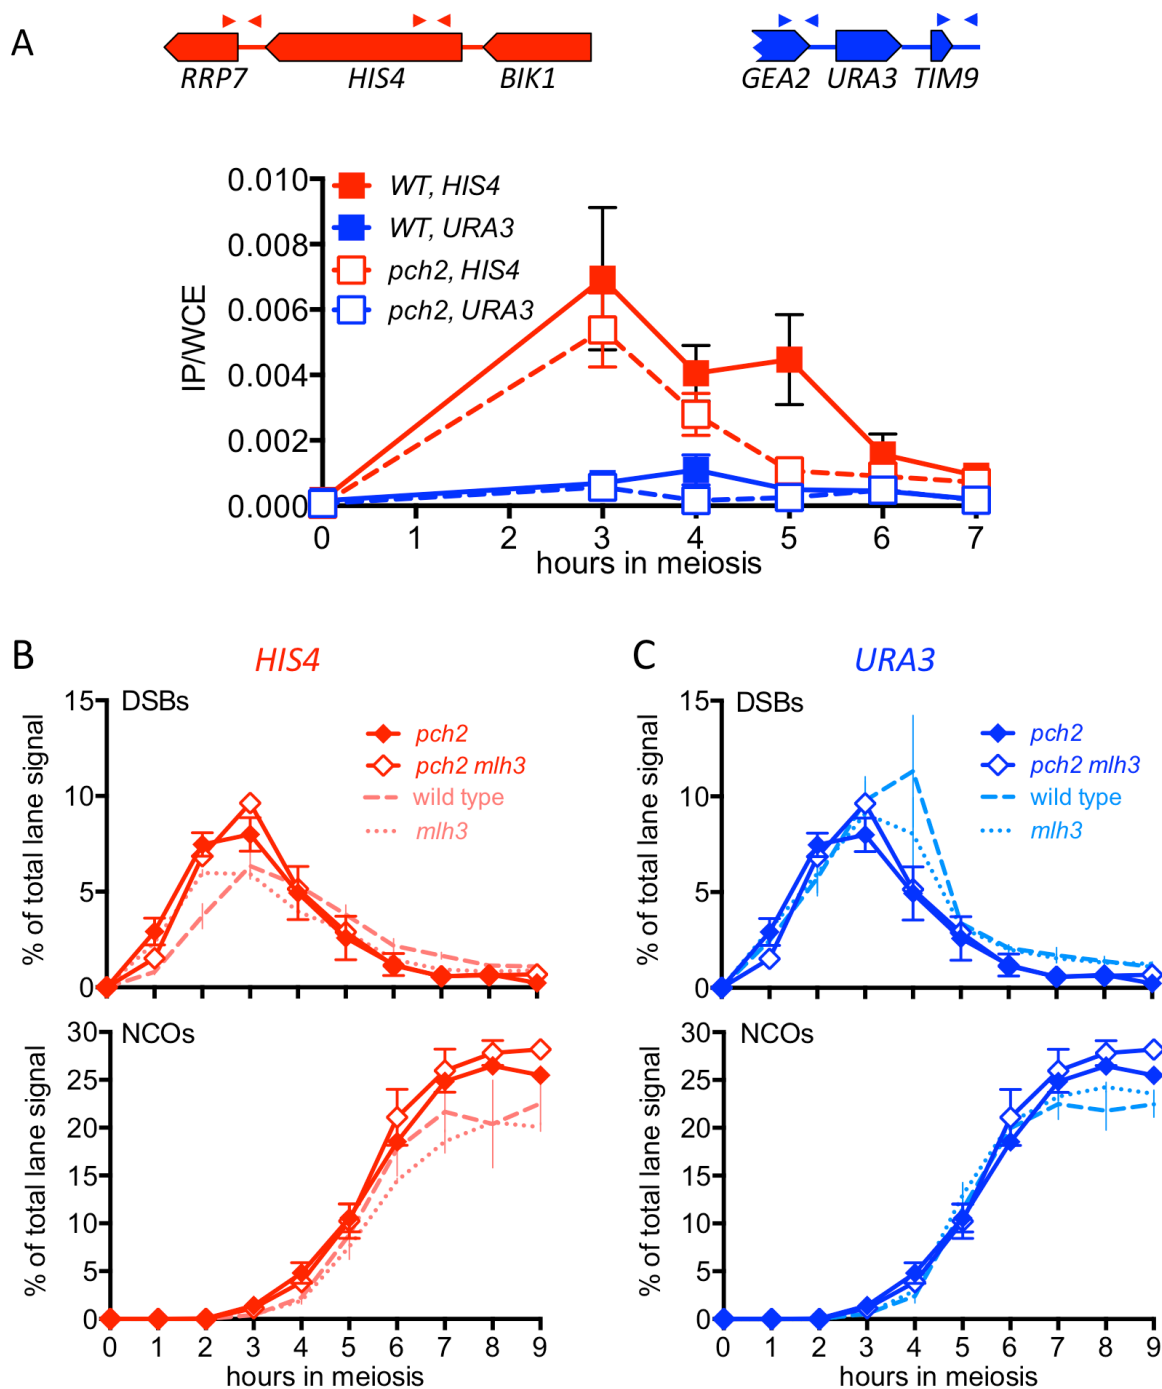

**Figure 4—figure supplement 1.** Hop1 occupancy, DSBs and NCOs. **(A)** Hop1 occupancy at corresponding loci lacking inserts, determined as in Figure 4A. Occupancy at *HIS4* is from strains with inserts at *URA3*, and vice versa. **(B)** DSBs and NCO frequencies in inserts at *HIS4*, determined as in Figure 2B and 2C, respectively. Symbols are as in Figure 4B. **(C)** DSBs and NCOs in inserts at *URA3*, details as in panel B. Values are from two independent experiments; error bars represent standard error of the mean. Representative Southern blots are in Figure 4—figure supplement 2.

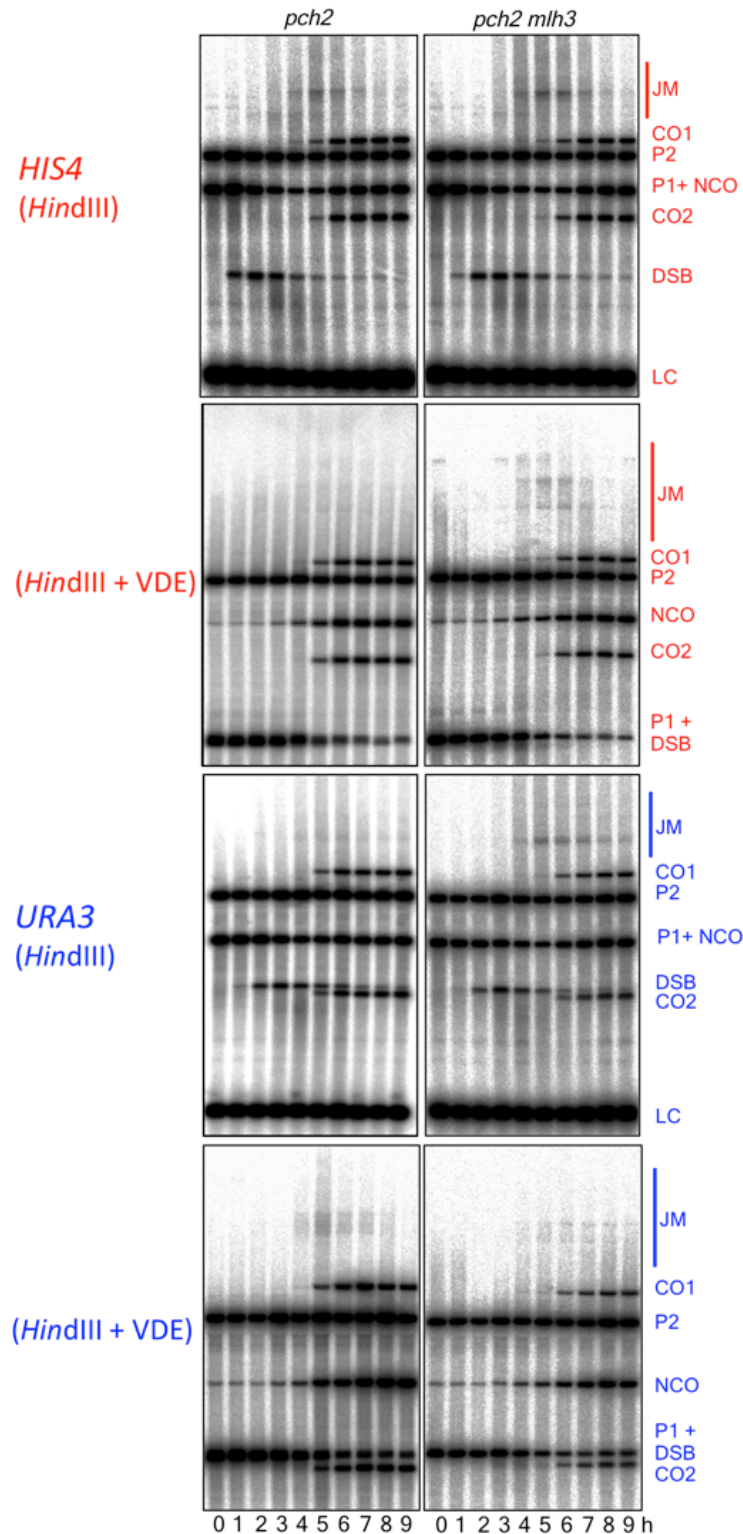

**Figure 4—figure supplement 2.** Representative Southern blots. Blots are of *HindIII* and *HindIII*-VDE digests of DNA from *HIS4* insert-containing strains (top) and from *URA3* insert-containing strains (bottom). Gel labels as in Figure 1; JM—joint molecule recombination intermediates.

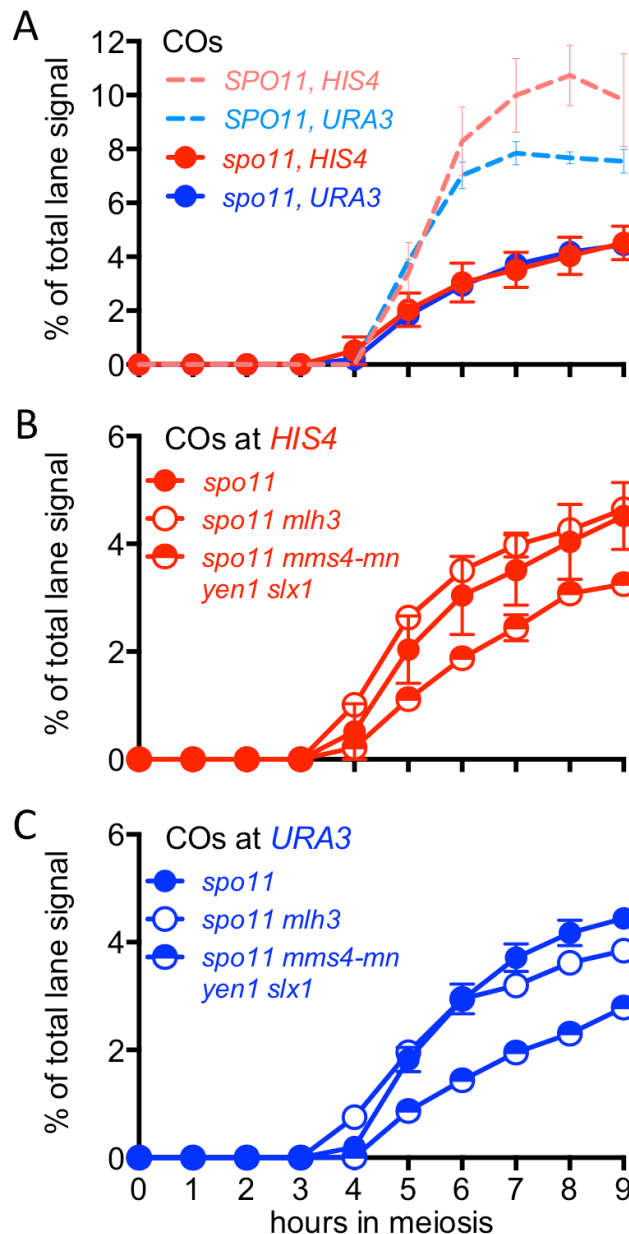

**Figure 5.** VDE-initiated COs are reduced and are MutL $\gamma$ -independent in the absence of Spo11 activity. (A) VDE-initiated crossover frequencies as measured in Figure 2(C) in *spo11-Y135F* strains (dark solid lines) in inserts at *HIS4* (red) and at *URA3* (blue). Data from the corresponding *SPO11* strains (dotted lines, from Figure 2C) are presented for comparison. (B) CO frequencies in *HIS4* inserts in *spo11* strains that are otherwise wild-type (*spo11*) or lack either MutL $\gamma$  (*spo11 mlh3 $\Delta$* ) or structure-selective nucleases (*spo11 mms4-mn yen1 $\Delta$  slx1 $\Delta$* ). (C) As in B, but with strains with inserts at *URA3*. Values are from two independent experiments; error bars represent standard error of the mean.

The following figure supplements are available for Figure 5:

**Figure supplement 1.** DSBs and recombinant products in *spo11* strains.

**Figure supplement 2.** Representative Southern blots.



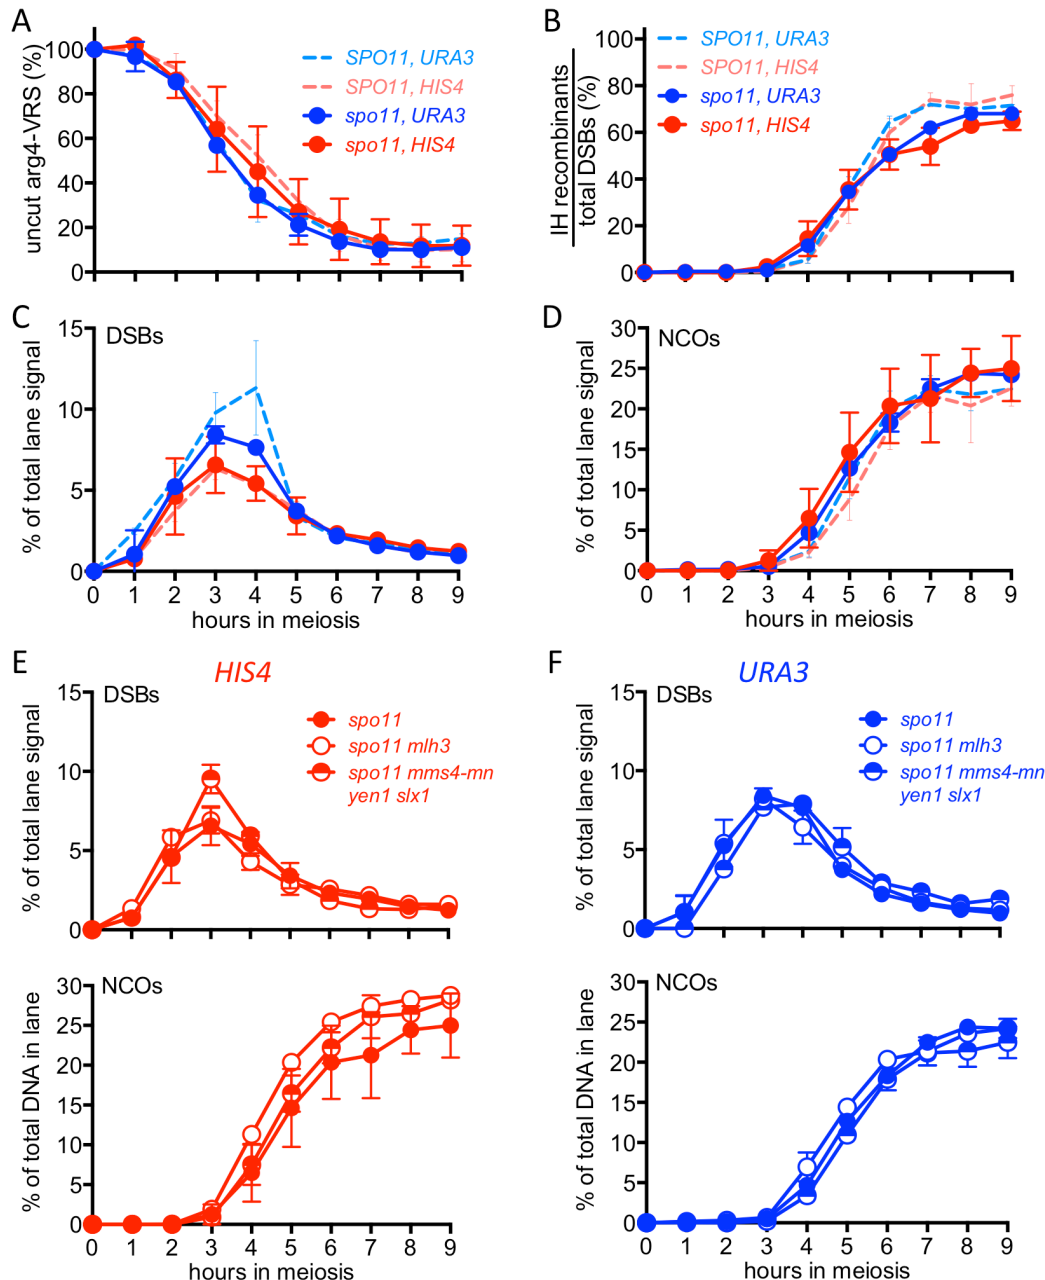

**Figure 5—figure supplement 1.** DSBs and recombinant products in *spo11* strains. (A) Cumulative DSB levels, expressed as loss of the VRS-containing insert, calculated as in Figure 2A. (B) Relative recovery of recombination products, calculated as in Figure 2—figure supplement 1B. (C) VDE-DSB frequencies, calculated as in Figure 2B. (D) NCO frequencies as in Figure 2C. In all four panels, solid lines denote data from *spo11* strains; data for wild type (dotted lines, from Figure 2 and Figure 2—figure supplement 1) are presented for comparison. (E) DSB (top) and NCO (bottom) frequencies in *spo11-Y135F* strains with inserts at *HIS4*. (F) DSB (top) and NCO (bottom) levels in *spo11-Y135F* strains with inserts at *URA3*. For all panels, values are from two independent experiments; error bars represent standard error of the mean. Representative Southern blots are in Figure 5—figure supplement 2.

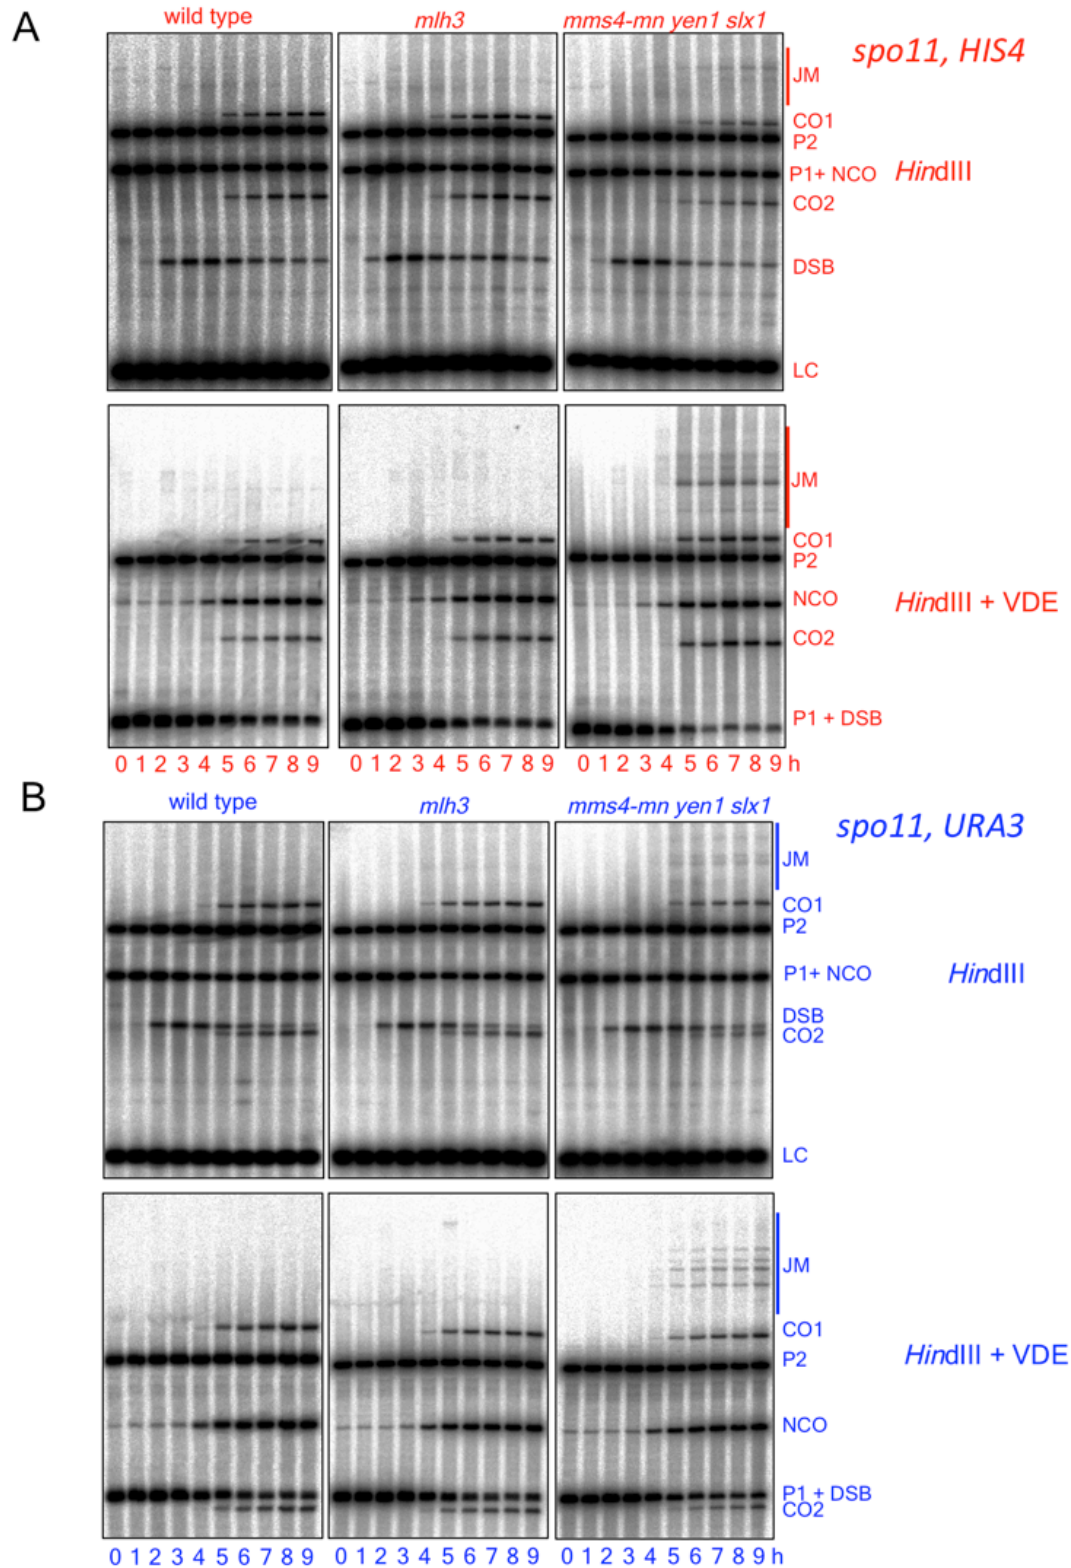

**Figure 5—figure supplement 2.** Representative Southern blots. Blots are of of *HindIII* and *HindIII*-VDE digests of DNA from *spo11* strains with inserts at *HIS4* (top) and at *URA3* (bottom). Gel labels as in Figure 1; JM—joint molecule recombination intermediates.

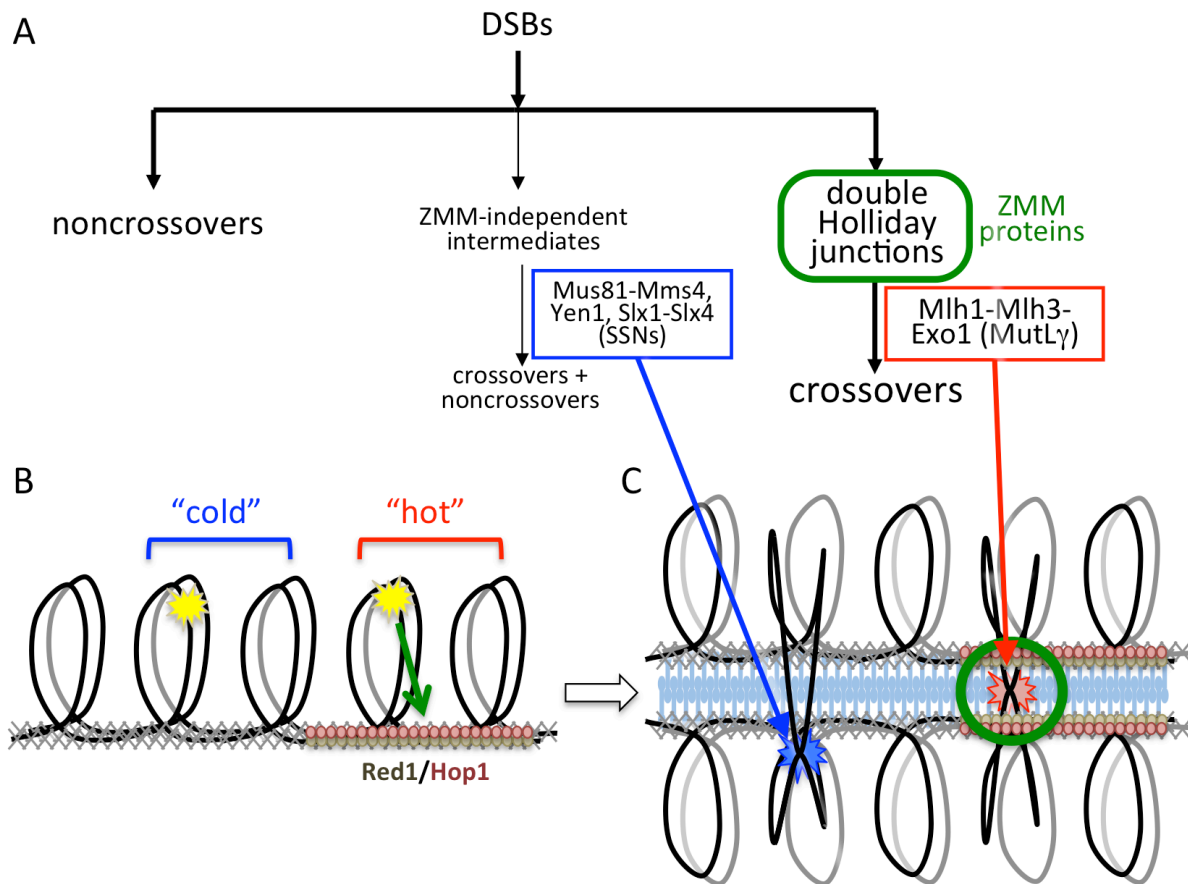

**Figure 6.** Different resolvase functions in different genome domains. **(A)** Early crossover decision model for meiotic recombination (Bishop and Zickler, 2004; Hollingsworth and Brill, 2004) illustrating early noncrossover formation, a major pathway where recombination intermediates form in the context of ZMM proteins and are resolved by MutLγ to form crossovers, and a minor pathway where ZMM-independent intermediates are resolved by SSNs as both crossovers and noncrossovers. **(B)** Division of the meiotic genome into meiotic axis-protein-enriched "hot" domains (red) that are enriched for Red1 and Hop1, and "cold" domains where Red1 and Hop1 are depleted. VDE DSBs (yellow stars) can be directed to form efficiently in either domain, but only VDE DSBs that form in "hot" domains can be recruited to the meiotic axis. **(C)** DSBs in "hot" domains can form joint molecules (red star) in the context of ZMM proteins and the synaptonemal complex, and thus can be resolved by MutLγ-dependent activities. DSBs in "cold" domains form joint molecules outside of this structural context, and are resolved by MutLγ-independent activities.
